# Supplementary material for: Decarboxylative, trienamine mediated cycloaddition for the synthesis of 3,4-dihydrocoumarin derivatives
Source: Royal Society of Chemistry journal article supplement (doi:10.1039/c9ob00386j), 2019-01-01
Supplement: c9ob00386j1.pdf [file c9ob00386j1.pdf]

## Decarboxylative, trienamine mediated cycloaddition for the synthesis of 3,4-dihydrocoumarin derivatives

Anna Albrecht,<sup>a\*</sup> Jan Bojanowski,<sup>a</sup> Adrianna Kot,<sup>a</sup> Lesław Sieroń,<sup>b</sup>

<sup>a</sup> Institute of Organic Chemistry, Department of Chemistry, Lodz University of Technology, Zeromskiego 116, 90-924 Łódź, Poland

<sup>b</sup> Institute of Inorganic Chemistry, Department of Chemistry, Lodz University of Technology, 90-924 Łódź, Poland

[anna.albrecht@p.lodz.pl](mailto:anna.albrecht@p.lodz.pl)

### Contents

|    |                                                                                                                                                                                                             |     |
|----|-------------------------------------------------------------------------------------------------------------------------------------------------------------------------------------------------------------|-----|
| 1. | General methods                                                                                                                                                                                             | S2  |
| 2. | Decarboxylative, trienamine mediated cycloaddition – general procedure                                                                                                                                      | S3  |
| 3. | Crystal and X-ray data                                                                                                                                                                                      | S9  |
| 4. | Relative configuration assignment                                                                                                                                                                           | S11 |
| 5. | Synthesis of (6 <i>aS</i> ,7 <i>R</i> ,10 <i>R</i> ,10 <i>aR</i> )-7-((1,3-dioxolan-2-yl)methyl)-10-propyl-6 <i>a</i> ,7,8,9,10,10 <i>a</i> -hexahydro-6 <i>H</i> -benzo[ <i>c</i> ]chromen-6-one <b>5I</b> | S12 |
| 6. | Synthesis of (6 <i>aS</i> ,7 <i>S</i> ,10 <i>R</i> ,10 <i>aR</i> )-7-(2-hydroxyethyl)-10-propyl-6 <i>a</i> ,7,10,10 <i>a</i> -tetrahydro-6 <i>H</i> -benzo[ <i>c</i> ]chromen-6-one <b>6I</b>               | S13 |
| 7. | NMR Data                                                                                                                                                                                                    | S14 |
| 8. | HPLC Data                                                                                                                                                                                                   | S27 |

## 1. General methods

NMR spectra were acquired on a Bruker Ultra Shield 700 instrument, running at 700 MHz for  $^1\text{H}$  and 176 MHz for  $^{13}\text{C}$ , respectively. Chemical shifts ( $\delta$ ) are reported in ppm relative to residual solvent signals ( $\text{CDCl}_3$ : 7.26 ppm for  $^1\text{H}$  NMR, 77.16 ppm for  $^{13}\text{C}$  NMR). Mass spectra were recorded on a Bruker Maxis Impact spectrometer using electrospray (ES+) ionization (referenced to the mass of the charged species). Analytical thin layer chromatography (TLC) was performed using pre-coated aluminum-backed plates (Merck Kieselgel 60 F254) and visualized by ultraviolet irradiation or  $\text{I}_2$  stain. Unless otherwise noted, analytical grade solvents and commercially available reagents were used without further purification. For flash chromatography (FC) silica gel (Silica gel 60, 230-400 mesh, Fluka). The enantiomeric ratio (er) of the products were determined by Ultra Performance Convergence Chromatography (UPC<sup>2</sup>) or HPLC using Daicel Chiralpak IA, IB, ID and IG columns as chiral stationary phases. Aldehydes **1** were synthesized according to the literature procedure.<sup>1</sup> Coumarin-3-carboxylic acids **2** were prepared from the corresponding substituted 2-hydroxy-benzaldehydes following the literature procedure.<sup>2</sup>

---

<sup>1</sup> A. Skrzyńska, P. Drelich, S. Frankowski and Ł. Albrecht, *Chem. Eur. J.* 2018, **24**, 16543.

<sup>2</sup> A. Song, X. Wang and K. S. Lam, *Tetrahedron Lett.* 2003, **44**, 1755.

## 2. Decarboxylative, trienamine mediated cycloaddition – general procedure

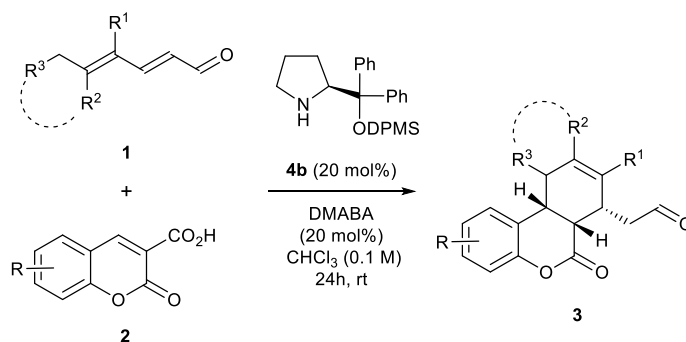

An ordinary screw-cap vial was charged with a magnetic stirring bar, the corresponding coumarin-3-carboxylic acid **2** (0.2 mmol, 1 equiv), CHCl<sub>3</sub> (2 mL), catalyst **4b** (0.04 mmol, 0.2 equiv), 4-(dimethylamino)benzoic acid (0.04 mmol, 6.6 mg) and the corresponding 2,4-dienal **1** (0.4 mmol, 2 equiv). The reaction mixture was stirred at room temperature and monitored by <sup>1</sup>H NMR spectroscopy. After complete consumption of the coumarin-3-carboxylic acid **2** the mixture was directly subjected to FC on silica gel (hexane:diethyl ether 4:1) to afford pure product **3**.

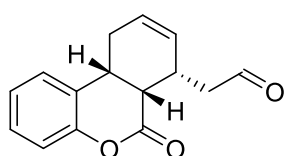

### (3a) 2-((6aS,7S,10aR)-6-Oxo-6a,7,10,10a-tetrahydro-6H-benzo[c]chromen-7-yl)acetaldehyde

Pure product was isolated by flash chromatography on silica gel (hexane:diethyl ether 4:1) as yellow crystals in 93% yield, 2:1 dr. <sup>1</sup>H NMR (700 MHz, CDCl<sub>3</sub>) δ 9.86 (d, *J* = 0.7 Hz, 1H<sub>major</sub>), 9.84 (dd, *J* = 2.2, 1.1 Hz, 1H<sub>minor</sub>), 7.29 (tdd, *J* = 7.3, 1.6, 0.8 Hz, 1H<sub>minor</sub>), 7.28 – 7.26 (m, 1H<sub>minor</sub>), 7.25 (dd, *J* = 8.1, 1.6 Hz, 1H<sub>major</sub>), 7.20 – 7.19 (m, 1H<sub>major</sub>), 7.17 (td, *J* = 7.5, 1.2 Hz, 1H<sub>minor</sub>), 7.10 (td, *J* = 7.4, 1.2 Hz, 1H<sub>major</sub>), 7.07 (dd, *J* = 8.0, 1.2 Hz, 1H<sub>minor</sub>), 7.04 (dd, *J* = 8.1, 1.2 Hz, 1H<sub>major</sub>), 5.87 (ddt, *J* = 10.2, 5.9, 2.2 Hz, 1H<sub>minor</sub>), 5.71 – 5.64 (m, 1H<sub>major</sub>), 5.59 – 5.54 (m, 1H<sub>major+minor</sub>), 3.42 (ddd, *J* = 19.4, 7.7, 0.6 Hz, 1H<sub>major</sub>), 3.31 – 3.27 (m, 1H<sub>minor</sub>), 3.27 – 3.20 (m, 3H<sub>major+minor</sub>), 3.05 (ddd, *J* = 19.4, 6.3, 0.7 Hz, 1H<sub>major</sub>), 2.86 (dt, *J* = 17.1, 1.7 Hz, 1H<sub>minor</sub>), 2.59 (ddd, *J* = 17.2, 8.5, 2.2 Hz, 1H<sub>minor</sub>), 2.47 – 2.36 (m, 2H<sub>major+minor</sub>), 2.28 – 2.19 (m, 1H<sub>minor</sub>), 2.09 – 2.00 (m, 1H<sub>major</sub>). <sup>13</sup>C NMR (176 MHz, CDCl<sub>3</sub>) δ<sub>major</sub> 201.4, 168.7, 151.0, 129.0, 128.7, 128.4, 126.8, 125.4, 124.9, 116.8, 47.0, 41.3, 36.4, 31.0, 29.8. δ<sub>minor</sub> 201.1, 170.0, 150.8, 129.0, 128.6, 128.6, 126.3, 124.6, 124.5, 116.6, 49.0, 43.2, 32.7, 31.8, 28.6. HRMS: calculated for [C<sub>15</sub>H<sub>14</sub>O<sub>3</sub>+H<sup>+</sup>]: 243.1016, found: 243.1027. The er was determined by UPC<sup>2</sup> using a chiral Chiralpack IG column gradient from 100% CO<sub>2</sub> up to 40%; *i*-PrOH, 2.5 mL/min; detection wavelength = 245 nm; τ<sub>major</sub> = 3.68 min, τ<sub>minor</sub> = 3.73 min, (93:7 er) for major diastereoisomer, detection wavelength = 245 nm; τ<sub>major</sub> = 3.21 min, τ<sub>minor</sub> = 3.27 min, (96:4 er) for minor diastereoisomer.

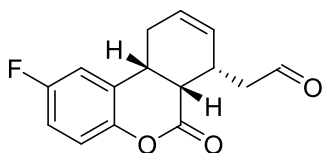

### (3b) 2-((6aS,7S,10aR)-2-Fluoro-6-oxo-6a,7,10,10a-tetrahydro-6H-benzo[c]chromen-7-yl)acetaldehyde

Pure product was isolated by flash chromatography on silica gel (hexane:diethyl ether 4:1) as yellow oil in 73% yield, 2:1 dr. <sup>1</sup>H NMR (700 MHz, CDCl<sub>3</sub>) δ 9.84 (s, 1H<sub>major</sub>), 9.83 (dd, *J* = 2.1, 1.1 Hz, 1H<sub>minor</sub>), 7.04 – 6.98 (m, 1H<sub>major</sub> and 2H<sub>minor</sub>), 6.97 – 6.93 (m, 1H<sub>major+minor</sub>), 6.91 (dd, *J* = 8.0, 2.9 Hz, 1H<sub>major</sub>), 5.86 (ddt, *J* = 10.1, 5.8, 2.3 Hz, 1H<sub>minor</sub>), 5.71 – 5.66 (m, 1H<sub>major+minor</sub>), 5.58 – 5.54 (m, 1H<sub>major</sub>), 3.43 (ddd, *J* = 19.4, 7.9, 0.6 Hz, 1H<sub>major</sub>), 3.28 (dddq, *J* = 10.2, 6.1, 4.1, 1.9 Hz, 1H<sub>minor</sub>), 3.25 – 3.19 (m, 1H<sub>major+2H<sub>minor</sub></sub>), 3.17 – 3.08 (m, 1H<sub>major</sub>), 3.08 – 2.99 (m, 1H<sub>major</sub>), 2.84 – 2.76 (m, 1H<sub>minor</sub>), 2.61 (ddd, *J* = 17.3, 8.5, 2.1 Hz, 1H<sub>minor</sub>), 2.43 (dd, *J* = 14.6, 9.9 Hz, 1H<sub>major</sub>), 2.42 – 2.39 (m, 1H<sub>major+minor</sub>), 2.27 –

2.17 (m, 1H<sub>minor</sub>), 2.10 – 2.00 (m, 1H<sub>major</sub>). <sup>13</sup>C NMR (176 MHz, CDCl<sub>3</sub>) δ<sub>major</sub> 201.3, 168.3, 158.9 (d, *J* = 244.1 Hz), 146.9 (d, *J* = 2.6 Hz), 130.1 (d, *J* = 8.0 Hz), 128.8, 124.6, 118.1 (d, *J* = 8.5 Hz), 115.0 (d, *J* = 23.5 Hz), 113.5 (d, *J* = 23.7 Hz), 46.9, 40.9, 36.5, 30.9, 29.5. δ<sub>minor</sub> 200.9, 169.6, 159.4 (d, d, *J* = 242.9 Hz), 146.8 (d, *J* = 2.5 Hz), 129.2, 128.1 (d, *J* = 7.6 Hz), 124.1, 117.9 (d, *J* = 8.4 Hz), 115.2 (d, *J* = 23.5 Hz), 112.4 (d, *J* = 24.7 Hz), 48.8, 42.7, 32.8, 31.8, 28.5. HRMS: calculated for [C<sub>15</sub>H<sub>13</sub>FO<sub>3</sub>+H<sup>+</sup>]: 261.0921, found: 261.0909. For major diastereoisomer the er was determined by UPC<sup>2</sup> using a chiral Chiralpack IG column gradient from 100% CO<sub>2</sub> up to 40%; *i*-PrOH, 2.5 mL/min; detection wavelength = 245 nm; τ<sub>major</sub> = 2.83 min, τ<sub>minor</sub> = 3.04 min, (92:8 er). For minor diastereoisomer the er was determined by UPC<sup>2</sup> using a chiral Chiralpack IG column gradient from 100% CO<sub>2</sub> up to 40%; *i*-PrOH, 2.5 mL/min; detection wavelength = 245 nm; τ<sub>major</sub> = 3.18 min, τ<sub>minor</sub> = 3.32 min, (96:4 er).

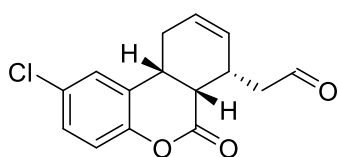

**(3c) 2-((6aS,7S,10aR)-2-Chloro-6-oxo-6a,7,10,10a-tetrahydro-6H-benzo[c]chromen-7-yl)acetaldehyde**

Pure product was isolated by flash chromatography on silica gel (hexane:diethyl ether 4:1) as yellow crystals in 78% yield, 2:1 dr. <sup>1</sup>H NMR (700 MHz, CDCl<sub>3</sub>) δ 9.84 (s, 1H<sub>major</sub>), 9.83 (dd, *J* = 2.1, 1.1 Hz, 1H<sub>minor</sub>), 7.25 – 7.20 (m, 1H<sub>major+minor</sub>), 7.18 (t, *J* = 2.7 Hz, 1H<sub>major+minor</sub>), 7.01 – 6.96 (m, 1H<sub>major+minor</sub>), 5.86 (ddt, *J* = 10.2, 5.8, 2.3 Hz, 1H<sub>minor</sub>), 5.71 – 5.65 (m, 1H<sub>major</sub>), 5.65 – 5.60 (m, 1H<sub>minor</sub>), 5.56 (dq, *J* = 10.2, 1.2 Hz, 1H<sub>major</sub>), 3.45 – 3.34 (m, 1H<sub>major</sub>), 3.31 – 3.15 (m, 3H<sub>major+minor</sub>), 3.12 – 3.07 (m, 1H<sub>minor</sub>), 3.07 – 2.97 (m, 1H<sub>major+minor</sub>), 2.91 (dd, *J* = 17.3, 6.9 Hz, 1H<sub>minor</sub>), 2.81 (dddd, *J* = 13.4, 9.5, 6.6, 5.0 Hz, 1H<sub>minor</sub>), 2.68 – 2.49 (m, 1H<sub>minor</sub>), 2.46 – 2.34 (m, 1H<sub>major+minor</sub>), 2.09 – 1.94 (m, 1H<sub>major</sub>). <sup>13</sup>C NMR (176 MHz, CDCl<sub>3</sub>) δ<sub>major</sub> 201.3, 168.1, 149.5, 130.1, 129.3, 128.7, 128.5, 128.4, 126.8, 124.6, 118.2, 46.8, 40.9, 36.3, 30.9, 29.6. δ<sub>minor</sub> 200.9, 167.8, 149.5, 130.1, 129.3, 128.8, 128.5, 125.7, 124.1, 118.0, 48.8, 42.8, 33.3, 32.8, 31.8. HRMS: calculated for [C<sub>15</sub>H<sub>13</sub>ClO<sub>3</sub>+H<sup>+</sup>]: 277.0626, found: 277.0632. For major diastereoisomer the er was determined by UPC<sup>2</sup> using a chiral Chiralpack IA column gradient from 100% CO<sub>2</sub> up to 40%; *i*-PrOH, 2.5 mL/min; detection wavelength = 245 nm; τ<sub>major</sub> = 2.84 min, τ<sub>minor</sub> = 3.04 min, (91:9 er). For minor diastereoisomer the er was determined by UPC<sup>2</sup> using a chiral Chiralpack IA column gradient from 100% CO<sub>2</sub> up to 40%; *i*-PrOH, 2.5 mL/min; detection wavelength = 245 nm; τ<sub>major</sub> = 3.25 min, τ<sub>minor</sub> = 3.40 min, (98:2 er).

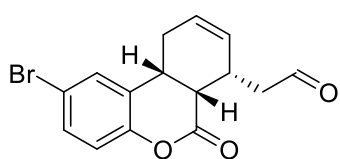

**(3d) 2-((6aS,7S,10aR)-2-Bromo-6-oxo-6a,7,10,10a-tetrahydro-6H-benzo[c]chromen-7-yl)acetaldehyde**

Pure product was isolated by flash chromatography on silica gel (hexane:diethyl ether 4:1) as yellow oil in 65% yield, 2:1 dr. <sup>1</sup>H NMR (700 MHz, CDCl<sub>3</sub>) δ 9.84 (s, 1H<sub>major</sub>), 9.83 (dd, *J* = 2.1, 1.1 Hz, 1H<sub>minor</sub>), 7.42 – 7.34 (m, 1H<sub>major+minor</sub>), 7.33 (d, *J* = 2.4 Hz, 1H<sub>major</sub>), 6.93 (dd, *J* = 15.9, 8.6 Hz, 1H<sub>major+minor</sub>), 5.86 (ddt, *J* = 10.2, 5.9, 2.2 Hz, 1H<sub>minor</sub>), 5.69 – 5.64 (m, 1H<sub>major+minor</sub>), 5.59 – 5.50 (m, 1H<sub>major</sub>), 3.42 (dd, *J* = 17.3, 3.6, 1.1 Hz, 1H<sub>major</sub>), 3.29 – 3.24 (m, 1H<sub>minor</sub>), 3.24 – 3.17 (m, 3H<sub>major</sub>), 3.10 (ddd, *J* = 19.4, 7.7 Hz, 1H<sub>minor</sub>), 3.03 (ddd, *J* = 19.5, 6.1, 0.6 Hz, 1H<sub>major</sub>), 2.85 – 2.78 (m, 1H<sub>minor</sub>), 2.60 (ddd, *J* = 17.3, 8.4, 2.1 Hz, 1H<sub>minor</sub>), 2.47 – 2.35 (m, 1H<sub>major+minor</sub>), 2.27 – 2.18 (m, 1H<sub>minor</sub>), 2.07 – 1.97 (m, 1H<sub>major</sub>). <sup>13</sup>C NMR (176 MHz, CDCl<sub>3</sub>) δ<sub>major</sub> 201.2, 168.0, 150.0, 131.4, 129.7, 128.7, 124.6, 118.6, 116.77, 46.8, 40.9, 36.3, 30.8, 29.6. δ<sub>minor</sub> 200.9, 169.3, 149.9, 131.6, 129.1, 128.6, 127.1, 124.1, 118.4, 117.4, 48.8, 42.8, 32.7, 31.7, 28.5. HRMS: calculated for [C<sub>15</sub>H<sub>13</sub>BrO<sub>3</sub>+H<sup>+</sup>]: 321.0121, found: 321.0132. For major diastereoisomer the er was determined by UPC<sup>2</sup> using a chiral Chiralpack IG column gradient from 100% CO<sub>2</sub> up to 40%; *i*-PrOH, 2.5 mL/min; detection wavelength = 245 nm; τ<sub>major</sub> = 3.46 min, τ<sub>minor</sub> = 3.79 min, (90:10 er).

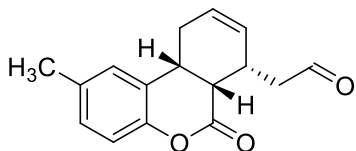

**(3e) 2-((6a*S*,7*S*,10a*R*)-2-Methyl-6-oxo-6a,7,10,10a-tetrahydro-6*H*-benzo[*c*]chromen-7-yl)acetaldehyde**

Pure product was isolated by flash chromatography on silica gel (hexane:diethyl ether 4:1) as yellow oil in 92% yield, 2:1 dr. Major diastereoisomer was isolated by FC in 58% yield. <sup>1</sup>H NMR (700 MHz, CDCl<sub>3</sub>) δ<sub>major</sub> 9.82 (t, *J* = 1.7 Hz, 1H), 7.09 (ddd, *J* = 8.3, 2.2, 0.8 Hz, 1H), 7.02 (d, *J* = 2.1 Hz, 1H), 6.98 (d, *J* = 8.2 Hz, 1H), 5.84 – 5.66 (m, 2H), 3.58 (s, 1H), 3.09 (ddd, *J* = 16.1, 10.6, 5.8 Hz, 1H), 2.82 (d, *J* = 2.7 Hz, 1H), 2.69 (ddd, *J* = 17.1, 6.3, 1.6 Hz, 1H), 2.60 (ddd, *J* = 17.1, 8.2, 1.9 Hz, 1H), 2.33-2.37 (m, 1H), 2.33 (s, 3H), 2.16 – 2.02 (m, 1H). <sup>13</sup>C NMR (176 MHz, CDCl<sub>3</sub>) δ<sub>major</sub> 200.3, 169.3, 148.8, 134.1, 129.0, 127.9, 127.5, 127.1, 125.4, 116.8, 48.3, 42.6, 30.8, 28.7, 28.3, 20.8. HRMS: calculated for [C<sub>16</sub>H<sub>16</sub>O<sub>3</sub>+H<sup>+</sup>]: 257.1172, found: 257.1160. For major diastereoisomer the er was determined by HPLC using a Chiralpak IG column [hexane/*i*-PrOH (80:20)]; flow rate 1.0 mL/min; τ<sub>major</sub> = 11.7 min; τ<sub>minor</sub> = 15.4 min (80:20 er). For minor diastereoisomer the er was determined by HPLC using a Chiralpak IG column [hexane/*i*-PrOH (80:20)]; flow rate 1.0 mL/min; τ<sub>major</sub> = 16.9 min; τ<sub>minor</sub> = 18.2 min (93:7er).

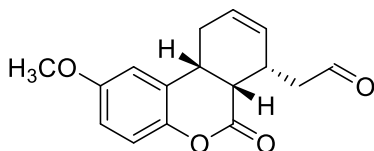

**(3f) 2-((6a*S*,7*S*,10a*R*)-2-Methoxy-6-oxo-6a,7,10,10a-tetrahydro-6*H*-benzo[*c*]chromen-7-yl)acetaldehyde**

Pure product was isolated by flash chromatography on silica gel (hexane:diethyl ether 4:1) as yellow powder in 95% yield, 2:1 dr. <sup>1</sup>H NMR (700 MHz, CDCl<sub>3</sub>) δ 9.84 (d, *J* = 1.3 Hz, 1H<sub>major</sub>), 9.83 – 9.80 (m, 1H<sub>minor</sub>), 6.98 (dd, *J* = 8.8, 1.6 Hz, 1H<sub>minor</sub>), 6.95 (dd, *J* = 8.8, 1.4 Hz, 1H<sub>major</sub>), 6.82 – 6.78 (m, 1H<sub>minor</sub>), 6.78 – 6.74 (m, 1H<sub>major+minor</sub>), 6.71 (d, *J* = 2.9 Hz, 1H<sub>major</sub>), 5.85 (ddd, *J* = 10.2, 5.1, 2.5 Hz, 1H<sub>minor</sub>), 5.71 – 5.62 (m, 1H<sub>major+minor</sub>), 5.54 (ddt, *J* = 10.0, 2.5, 1.3 Hz, 1H<sub>major</sub>), 3.79 (s, 3H<sub>minor</sub>), 3.79 (s, 3H<sub>major</sub>), 3.39 (ddd, *J* = 19.3, 7.8, 2.0 Hz, 1H<sub>major</sub>), 3.26 (dddd, *J* = 8.2, 6.2, 4.1, 2.3 Hz, 1H<sub>minor</sub>), 3.23 – 3.16 (m, 3H<sub>major</sub>), 3.04 (ddd, *J* = 19.4, 6.5, 0.7 Hz, 1H<sub>major</sub>), 3.07 – 3.03 (m, 1H<sub>minor</sub>), 2.80 (dtd, *J* = 17.0, 5.6, 5.2, 2.5 Hz, 1H<sub>minor</sub>), 2.57 (dddd, *J* = 17.2, 8.5, 2.1, 1.3 Hz, 1H<sub>minor</sub>), 2.43 – 2.32 (m, 1H<sub>major</sub>), 2.25 – 2.17 (m, 1H<sub>minor</sub>), 2.07 – 1.95 (m, 1H<sub>minor</sub>). <sup>13</sup>C NMR (176 MHz, CDCl<sub>3</sub>) δ<sub>major</sub> 201.4, 168.9, 156.1, 144.8, 129.6, 128.8, 124.8, 117.5, 113.2, 112.2, 55.7, 47.0, 41.3, 36.7, 31.0, 29.7. δ<sub>minor</sub> 201.1, 170.1, 156.4, 144.7, 129.1, 127.4, 124.3, 117.2, 112.9, 111.3, 55.7, 48.9, 43.0, 32.8, 31.7, 28.6. HRMS: calculated for [C<sub>16</sub>H<sub>16</sub>O<sub>4</sub>+H<sup>+</sup>]: 273.1121, found: 273.1109. The er was determined by UPC<sup>2</sup> using a chiral Chiralpak IA column gradient from 100% CO<sub>2</sub> up to 40%; *i*-PrOH, 2.5 mL/min; detection wavelength = 245 nm; τ<sub>major</sub> = 2.9 min, τ<sub>minor</sub> = 3.18 min, (94:6 er) for major diastereoisomer and τ<sub>major</sub> = 3.39 min, τ<sub>minor</sub> = 3.50 min, (98:2 er) for minor diastereoisomer.

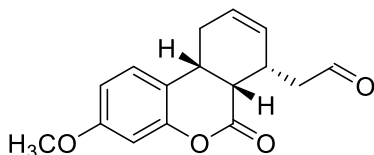

**(3g) 2-((6a*S*,7*S*,10a*R*)-3-Methoxy-6-oxo-6a,7,10,10a-tetrahydro-6*H*-benzo[*c*]chromen-7-yl)acetaldehyde**

Pure product was isolated by flash chromatography on silica gel (hexane:diethyl ether 4:1) as white powder in 87% yield, 2:1 dr. <sup>1</sup>H NMR (700 MHz, CDCl<sub>3</sub>) δ 9.84 (s, 1H<sub>major</sub>), 9.83 (dd, *J* = 2.2, 1.1 Hz, 1H<sub>minor</sub>), 7.11 (dd, *J* = 8.6, 1.2 Hz, 1H<sub>minor</sub>), 7.08 (d, *J* = 8.3 Hz, 1H<sub>major</sub>), 6.71 (dd, *J* = 8.6, 2.6 Hz, 1H<sub>minor</sub>), 6.64 (dd, *J* = 8.3, 2.5 Hz, 1H<sub>minor</sub>), 6.58-6.61 (m, 1H<sub>major+minor</sub>), 5.89 – 5.81 (m, 1H<sub>minor</sub>), 5.64-5.68 (m, 1H<sub>major+minor</sub>), 5.56 – 5.51 (m, 1H<sub>major</sub>), 3.79 (s, 3H<sub>minor</sub>), 3.78 (s, 3H<sub>major</sub>), 3.38 (dd, 20.8, 7.3 Hz, 1H<sub>major</sub>), 3.17-3.21 (m, 1H<sub>minor</sub>), 3.23 – 3.15 (m, 2H<sub>major+minor</sub>), 3.14 – 3.07 (m, 1H<sub>major</sub>), 3.03 (ddd, *J* = 19.4, 6.4, 0.7 Hz, 1H<sub>major</sub>), 3.07 – 3.03 (m, 1H<sub>minor</sub>), 2.85 – 2.76 (m, 1H<sub>major</sub>), 2.57 (ddd, *J* = 17.1, 8.5, 2.2 Hz, 1H<sub>minor</sub>), 2.43 – 2.33 (m, 1H<sub>minor+minor</sub>), 2.21 – 2.13 (m, 1H<sub>minor</sub>), 2.04 – 1.90 (m, 1H<sub>major</sub>). <sup>13</sup>C NMR (176 MHz, CDCl<sub>3</sub>) δ<sub>major</sub> 201.3, 168.7, 159.8, 151.7, 128.6, 127.2, 125.0, 120.6, 110.1, 102.52, 55.5, 46.9, 41.6, 35.7, 31.1, 30.1. δ<sub>minor</sub> 201.1, 170.1, 159.8, 151.5, 129.0, 126.0, 124.5, 118.3, 110.6, 102.2, 55.6, 48.93, 43.6, 32.3, 31.6, 28.9. HRMS: calculated for [C<sub>16</sub>H<sub>16</sub>O<sub>4</sub>+H<sup>+</sup>]: 273.1121, found: 273.1134. For

major diastereoisomer the er was determined by UPC<sup>2</sup> using a chiral Chiralpack IB column gradient from 100% CO<sub>2</sub> up to 40%; *i*-PrOH, 2.5 mL/min; detection wavelength = 245 nm;  $\tau_{\text{major}} = 2.81$  min,  $\tau_{\text{minor}} = 3.70$  min, (96:4 er).

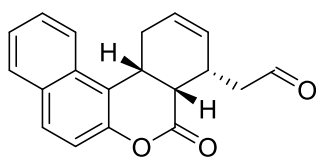

**(3h) 2-((4*S*,4*aS*,12*cR*)-5-Oxo-4,4*a*,5,12*c*-tetrahydro-1*H*-dibenzo[*c,f*]chromen-4-yl)acetaldehyde**

Pure product was isolated by flash chromatography on silica gel (hexane:diethyl ether 4:1) as yellow crystals in 95% yield, >20:1 dr. <sup>1</sup>H NMR (700 MHz, CDCl<sub>3</sub>)  $\delta$  9.88 (s, 1H), 7.94 (dt,  $J = 8.3, 0.9$  Hz, 1H), 7.86 (ddt,  $J = 8.2, 1.3, 0.6$  Hz, 1H), 7.83 – 7.73 (m, 1H), 7.58 (ddd,  $J = 8.3, 6.8, 1.3$  Hz, 1H), 7.47 (ddd,  $J = 8.0, 6.8, 1.1$  Hz, 1H), 7.23 (d,  $J = 8.8$  Hz, 1H), 5.75 (ddt,  $J = 10.1, 5.0, 2.6$  Hz, 1H), 5.63 (ddt,  $J = 10.2, 2.2, 1.2$  Hz, 1H), 3.94 (ddd,  $J = 11.4, 6.3, 4.8$  Hz, 1H), 3.47 (ddd,  $J = 19.3, 7.9, 0.6$  Hz, 1H), 3.38 – 3.32 (m, 1H), 3.31 (t,  $J = 4.8$  Hz, 1H), 3.12 (ddd,  $J = 19.3, 6.5, 0.6$  Hz, 1H), 2.72 – 2.58 (m, 1H), 2.06 – 2.12 (m, 1H). <sup>13</sup>C NMR (176 MHz, CDCl<sub>3</sub>)  $\delta$  201.4, 168.8, 148.5, 130.8, 130.2, 128.9, 128.8, 128.7, 127.3, 125.1, 124.9, 122.4, 121.9, 117.2, 47.0, 41.0, 32.7, 31.0, 28.7. HRMS: calculated for [C<sub>19</sub>H<sub>16</sub>O<sub>3</sub>+H<sup>+</sup>]: 293.1172, found: 293.1180. The er was determined by UPC<sup>2</sup> using a chiral Chiralpack IG column gradient from 100% CO<sub>2</sub> up to 40%; *i*-PrOH, 2.5 mL/min; detection wavelength = 245 nm;  $\tau_{\text{major}} = 3.89$  min,  $\tau_{\text{minor}} = 4.37$  min, (57:43 er).

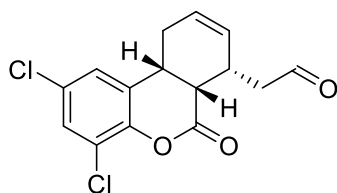

**(3i) 2-((6*aS*,7*S*,10*aR*)-2,4-Dichloro-6-oxo-6*a*,7,10,10*a*-tetrahydro-6*H*-benzo[*c*]chromen-7-yl)acetaldehyde**

Pure product was isolated by flash chromatography on silica gel (hexane:diethyl ether 4:1) as yellow crystals in 78% yield, 2:1 dr. <sup>1</sup>H NMR (700 MHz, CDCl<sub>3</sub>)  $\delta$  9.85 (d,  $J = 0.5$  Hz, 1H<sub>major</sub>), 9.83 (dd,  $J = 2.0, 1.0$  Hz, 1H<sub>minor</sub>), 7.38 (dd,  $J = 2.4, 1.0$  Hz, 1H<sub>minor</sub>), 7.34 (d,  $J = 2.4$  Hz, 1H<sub>major</sub>), 7.13 (dd,  $J = 2.4, 1.3$  Hz, 1H<sub>minor</sub>), 7.10 (dd,  $J = 2.4, 0.5$  Hz, 1H<sub>major</sub>), 5.89 – 5.82 (m, 1H<sub>minor</sub>), 5.66-5.69 (m, 1H<sub>major+minor</sub>), 5.59 – 5.53 (m, 1H<sub>major</sub>), 3.50 – 3.36 (m, 1H<sub>major+minor</sub>), 3.33 – 3.19 (m, 3H<sub>major+minor</sub>), 3.11 (ddd,  $J = 17.4, 3.6, 1.0$  Hz, 1H<sub>minor</sub>), 3.03 (ddd,  $J = 19.4, 6.1, 0.5$  Hz, 1H<sub>major</sub>), 2.63 (ddd,  $J = 17.5, 8.4, 2.0$  Hz, 1H<sub>minor</sub>), 2.51 – 2.36 (m, 1H<sub>major</sub>), 2.05 – 1.98 (m, 1H<sub>major+minor</sub>). <sup>13</sup>C NMR (176 MHz, CDCl<sub>3</sub>)  $\delta_{\text{major}}$  201.1, 166.7, 145.7, 131.2, 129.3, 128.9, 128.7, 125.3, 124.3, 122.6, 46.7, 40.7, 36.7, 30.7, 29.3.  $\delta_{\text{minor}}$  200.7, 168.2, 145.6, 131.2, 129.3, 129.1, 128.0, 124.5, 124.2, 123.9, 48.5, 42.4, 33.1, 31.7, 28.5. HRMS: calculated for [C<sub>15</sub>H<sub>12</sub>Cl<sub>2</sub>O<sub>3</sub>+H<sup>+</sup>]: 311.0236, found: 311.0248. The er was determined by UPC<sup>2</sup> using a chiral Chiralpack IG column gradient from 100% CO<sub>2</sub> up to 40%; acetonitril, 2.5 mL/min; detection wavelength = 245 nm;  $\tau_{\text{major}} = 3.34$  min,  $\tau_{\text{minor}} = 3.53$  min, (60:40 er) for major diastereoisomer.

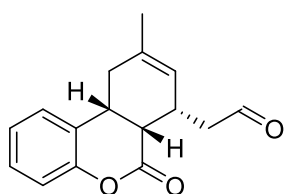

**(3j) 2-((6*aS*,7*S*,10*aR*)-9-Methyl-6-oxo-6*a*,7,10,10*a*-tetrahydro-6*H*-benzo[*c*]chromen-7-yl)acetaldehyde**

Pure product was isolated by flash chromatography on silica gel (hexane:diethyl ether 4:1) as yellow crystals in 67% yield, 1:1 dr. <sup>1</sup>H NMR (700 MHz, CDCl<sub>3</sub>)  $\delta$  9.85 (s, 1H<sub>minor</sub>), 9.83 (dd,  $J = 2.4, 1.1$  Hz, 1H<sub>major</sub>), 7.30 – 7.26 (m, 1H<sub>major+minor</sub>), 7.25 (td,  $J = 7.5, 1.4$  Hz, 1H<sub>major</sub>), 7.18 (dd,  $J = 7.5, 1.7$  Hz, 1H<sub>minor</sub>), 7.16 (td,  $J = 7.5, 1.3$  Hz, 1H<sub>major</sub>), 7.09 (td,  $J = 7.4, 1.2$  Hz, 1H<sub>minor</sub>), 7.05 (dd,  $J = 8.1, 1.3$  Hz, 1H<sub>major</sub>), 7.03 (dd,  $J = 8.1, 1.1$  Hz, 1H<sub>minor</sub>), 5.36 – 5.34 (m, 1H<sub>major</sub>), 5.26 – 5.24 (m, 1H<sub>minor</sub>), 3.36 (dd,  $J = 19.2, 7.4$  Hz, 1H<sub>minor</sub>), 3.27 – 3.20 (m, 1H<sub>major+minor</sub>), 3.20 – 3.12 (m, 2H<sub>major</sub> and 1H<sub>minor</sub>), 3.10 (ddd,  $J = 17.0, 3.7, 1.2$  Hz, 1H<sub>major</sub>), 3.02 (ddd,  $J = 19.3, 6.5, 0.7$  Hz, 1H<sub>minor</sub>), 2.67 (dd,  $J = 17.0, 5.7$  Hz, 1H<sub>minor</sub>), 2.51 (ddd,  $J = 17.0, 8.6, 2.4$  Hz, 1H<sub>major</sub>), 2.33 (dd,  $J = 14.1, 9.9$  Hz, 1H<sub>major</sub>), 2.26 – 2.17 (m, 1H<sub>major+minor</sub>), 2.01 – 1.93 (m, 1H<sub>minor</sub>), 1.79 (s, 3H<sub>major</sub>), 1.65 (s, 3H<sub>minor</sub>). <sup>13</sup>C NMR (176 MHz,

CDCl<sub>3</sub>)  $\delta_{\text{major}}$  201.5, 170.1, 150.9, 132.0, 128.5, 126.8, 125.4, 124.6, 123.2, 116.6, 49.4, 43.0, 33.5, 33.1, 31.9, 23.4.  $\delta_{\text{minor}}$  201.7, 168.8, 151.0, 132.3, 128.5, 128.4, 126.4, 124.3, 122.9, 116.8, 47.3, 41.2, 36.7, 34.6, 31.2, 23.0. HRMS: calculated for [C<sub>16</sub>H<sub>16</sub>O<sub>3</sub>+H<sup>+</sup>]: 256.1099, found: 256.1107. The er was determined by HPLC using a Chiralpak ID column [hexane/*i*-PrOH (80:20)]; flow rate 1.0 mL/min;  $\tau_{\text{major}} = 10.7$  min;  $\tau_{\text{minor}} = 11.8$  min, (86:14 er) for major diastereoisomer and  $\tau_{\text{major}} = 15.5$  min;  $\tau_{\text{minor}} = 17.2$  min, (99:1 er) for minor diastereoisomer.

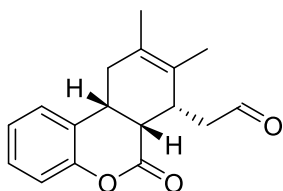

**(3k) 2-((6a*S*,7*R*,10a*R*)-8,9-Dimethyl-6-oxo-6a,7,10,10a-tetrahydro-6*H*-benzo[*c*]chromen-7-yl)acetaldehyde**

Pure product was isolated by flash chromatography on silica gel (hexane:diethyl ether 4:1) as yellow solid in 56% yield, 2:1 dr. <sup>1</sup>H NMR (700 MHz, CDCl<sub>3</sub>)  $\delta$  9.88 (s, 1H<sub>major</sub>), 9.78 (t, *J* = 2.3 Hz, 1H<sub>minor</sub>), 7.29 – 7.26 (m, 2H<sub>minor</sub>), 7.24 (ddd, *J* = 8.1, 7.4, 1.6 Hz, 1H<sub>major</sub>), 7.18 – 7.14 (m, 1H<sub>major</sub> + minor), 7.08 (td, *J* = 7.4, 1.2 Hz, 1H<sub>major</sub>), 7.06 (dd, *J* = 8.0, 1.3 Hz, 1H<sub>minor</sub>), 7.02 (dd, *J* = 8.1, 1.1 Hz, 1H<sub>major</sub>), 3.34 (ddd, *J* = 18.9, 7.9, 0.8 Hz, 1H<sub>major</sub>), 3.26 – 3.21 (m, 2H<sub>major</sub> and 1H<sub>minor</sub>), 3.20 – 3.12 (m, 2H<sub>major</sub>), 3.05 – 2.96 (m, 1H<sub>minor</sub>), 2.89 – 2.77 (m, 1H<sub>major</sub> + minor), 2.65 (dd, *J* = 16.3, 5.0 Hz, 1H<sub>minor</sub>), 2.57 (dd, *J* = 14.3, 9.6 Hz, 1H<sub>minor</sub>), 2.30 – 2.19 (m, 1H<sub>major</sub> + minor), 2.08 (ddtd, *J* = 16.0, 11.7, 2.1, 1.0 Hz, 1H<sub>minor</sub>), 1.81 – 1.76 (m, 3H<sub>minor</sub>), 1.73 – 1.68 (m, 3H<sub>minor</sub>), 1.65 (s, 3H<sub>major</sub>), 1.65 – 1.61 (s, 3H<sub>major</sub>). <sup>13</sup>C NMR (176 MHz, CDCl<sub>3</sub>)  $\delta_{\text{major}}$  202.1, 169.1, 151.0, 128.3, 126.8, 126.4, 125.3, 125.2, 124.21, 116.7, 45.4, 42.4, 36.4, 36.4, 34.8, 19.6, 16.0.  $\delta_{\text{minor}}$  202.2, 170.6, 151.0, 128.6, 128.5, 126.6, 125.8, 125.2, 124.2, 116.6, 46.7, 44.6, 37.0, 34.9, 32.9, 20.0, 16.8. HRMS: calculated for [C<sub>17</sub>H<sub>18</sub>O<sub>3</sub>+H<sup>+</sup>]: 270.1256, found: 270.1242. The er was determined by HPLC using a chiral Chiralpak IA column; [hexane/*i*-PrOH (95:5)]; flow rate 1.0 mL/min  $\tau_{\text{major}} = 10.0$  min,  $\tau_{\text{minor}} = 11.0$  min, (69:31 er), for major diastereoisomer, and  $\tau_{\text{major}} = 12.6$  min,  $\tau_{\text{minor}} = 13.2$  min, (68:32) for minor diastereoisomer.

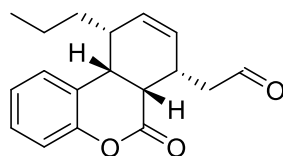

**(3l) 2-((6a*S*,7*S*,10*R*,10a*R*)-6-Oxo-10-propyl-6a,7,10,10a-tetrahydro-6*H*-benzo[*c*]chromen-7-yl)acetaldehyde**

Pure product was isolated by flash chromatography on silica gel (hexane:diethyl ether 4:1) as yellow crystals in 84% yield, 10:1 dr. <sup>1</sup>H NMR (700 MHz, CDCl<sub>3</sub>)  $\delta$  9.88 (d, *J* = 0.5 Hz, 1H), 7.30 (ddd, *J* = 8.1, 7.4, 1.7 Hz, 1H), 7.22 – 7.18 (m, 1H), 7.15 (td, *J* = 7.4, 1.2 Hz, 1H), 7.08 – 7.05 (m, 1H), 5.91 (ddd, *J* = 10.4, 4.5, 3.0 Hz, 1H), 5.58 – 5.55 (m, 1H), 3.49 (dd, *J* = 19.6, 8.3 Hz, 1H), 3.47 (t, *J* = 6.1 Hz, 1H), 3.22 – 3.17 (m, 1H), 3.16 (td, *J* = 5.5, 1.1 Hz, 1H), 3.04 (ddd, *J* = 19.3, 6.3, 0.6 Hz, 1H), 2.38 (ddtd, *J* = 11.0, 6.3, 4.2, 2.0 Hz, 1H), 1.43 – 1.35 (m, 1H), 1.18 – 1.08 (m, 1H), 1.03 (dddd, *J* = 13.1, 9.7, 7.3, 5.8 Hz, 1H), 0.96 – 0.89 (m, 1H), 0.72 (t, *J* = 7.3 Hz, 3H). <sup>13</sup>C NMR (176 MHz, CDCl<sub>3</sub>)  $\delta$  201.4, 169.8, 152.1, 129.6, 128.5, 127.5, 127.5, 126.8, 124.3, 116.5, 46.9, 40.2, 38.4, 37.8, 32.9, 30.6, 20.9, 13.9. HRMS: calculated for [C<sub>18</sub>H<sub>20</sub>O<sub>3</sub>+H<sup>+</sup>]: 285.1485, found: 285.1499. The er was determined by HPLC Chiralpak ID column [hexane/*i*-PrOH (80:20)]; flow rate 1.0 mL/min;  $\tau_{\text{major}} = 8.15$  min,  $\tau_{\text{minor}} = 9.36$  min, (97:3 er).

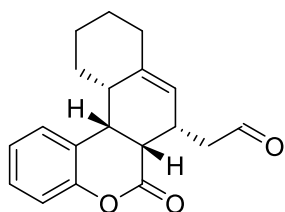

**(3m) 2-((6a*S*,7*S*,12a*S*,12b*R*)-6-Oxo-6a,7,9,10,11,12,12a,12b-octahydro-6*H*-naphtho[2,1-*c*]chromen-7-yl)acetaldehyde**

Pure product was isolated by flash chromatography on silica gel (hexane:diethyl ether 4:1) as yellow solid in 56% yield, 2:1 dr. <sup>1</sup>H NMR (700 MHz, CDCl<sub>3</sub>)  $\delta$  9.86 (d, *J* = 3.7 Hz, 1H<sub>major</sub> + minor), 7.27 – 7.23 (m, 1H<sub>major</sub> + minor), 7.21 (dt, *J* = 7.8, 1.5 Hz, 1H<sub>minor</sub>), 7.17 (dd, *J* = 7.5, 1.7 Hz, 1H<sub>major</sub>), 7.15 (td, *J* = 7.6, 1.3 Hz, 1H<sub>minor</sub>), 7.11 (td, *J* = 7.4, 1.2 Hz, 1H<sub>major</sub>), 7.02 (ddd, *J* = 9.3, 8.1, 1.2 Hz, 1H<sub>major</sub> + minor), 5.23 (q, *J* = 1.5 Hz, 1H<sub>major</sub> + minor), 3.45 (dd, *J* = 7.4, 5.7 Hz, 1H<sub>major</sub>),

3.41 – 3.36 (m, 1H<sub>major</sub>), 3.26 – 3.18 (m, 1H<sub>minor</sub>), 3.19 (ddd,  $J = 16.9, 3.5, 1.1$  Hz, 1H<sub>minor</sub>), 3.15 (dtd,  $J = 6.6, 3.6, 1.5$  Hz, 1H<sub>major</sub>), 3.07 (td,  $J = 5.3, 4.9, 1.1$  Hz, 1H<sub>major+minor</sub>), 3.04 (dd,  $J = 6.8, 0.7$  Hz, 1H<sub>minor</sub>), 2.68 (dt,  $J = 12.8, 3.3$  Hz, 1H<sub>minor</sub>), 2.66 – 2.61 (m, 1H<sub>minor</sub>), 2.61 – 2.57 (m, 1H<sub>minor</sub>), 2.32 – 2.19 (m, 2H<sub>major</sub>), 2.08 (td,  $J = 12.7, 6.0$  Hz, 1H<sub>minor</sub>), 2.00 – 1.90 (m, 1H<sub>major</sub>), 1.91 – 1.81 (m, 1H<sub>major</sub>), 1.73 (ddq,  $J = 12.1, 4.2, 2.3$  Hz, 1H<sub>major</sub>), 1.67 – 1.59 (m, 1H<sub>major + minor</sub>), 1.50 – 1.57 (m, 1H<sub>minor</sub>), 1.16-1.36 (m, 3H<sub>major</sub> and 2H<sub>minor</sub>), 0.99-1.13 (m, 1H<sub>major+minor</sub>). <sup>13</sup>C NMR (176 MHz, CDCl<sub>3</sub>) δ<sub>major</sub> 201.7, 169.5, 152.0, 140.6, 128.3, 127.5, 124.3, 119.7, 116.5, 47.4, 41.3, 40.1, 39.0, 36.4, 30.4, 29.7, 28.5, 27.0. δ<sub>minor</sub> 201.6, 170.0, 151.8, 142.7, 128.3, 127.1, 124.1, 122.2, 119.0, 117.0, 49.3, 39.9, 38.6, 37.2, 36.6, 32.8, 30.1, 28.8, 26.7. HRMS: calculated for [C<sub>19</sub>H<sub>20</sub>O<sub>3</sub>+H<sup>+</sup>]: 296.1412, found: 296.1417. The er was determined by HPLC using a chiral Chiralpack ID column [hexane/*i*-PrOH (90:10)]; flow rate 1.0 mL/min; τ<sub>major</sub> = 12.91 min, τ<sub>minor</sub> = 13.92 min, (99:1 er).



### 3. Crystal and X-ray data

The single crystal X-ray diffraction studies at 100 K revealed that compounds major-*ent*-**3e** (C<sub>16</sub>H<sub>16</sub>O<sub>3</sub>) and minor-**3f** (C<sub>16</sub>H<sub>16</sub>O<sub>4</sub>) and crystallize in the non-centrosymmetric monoclinic space group *P*2<sub>1</sub> (*Z* = 2) and the crystal structures consist of one crystallographically independent formula unit in the unit cell (Figure X).

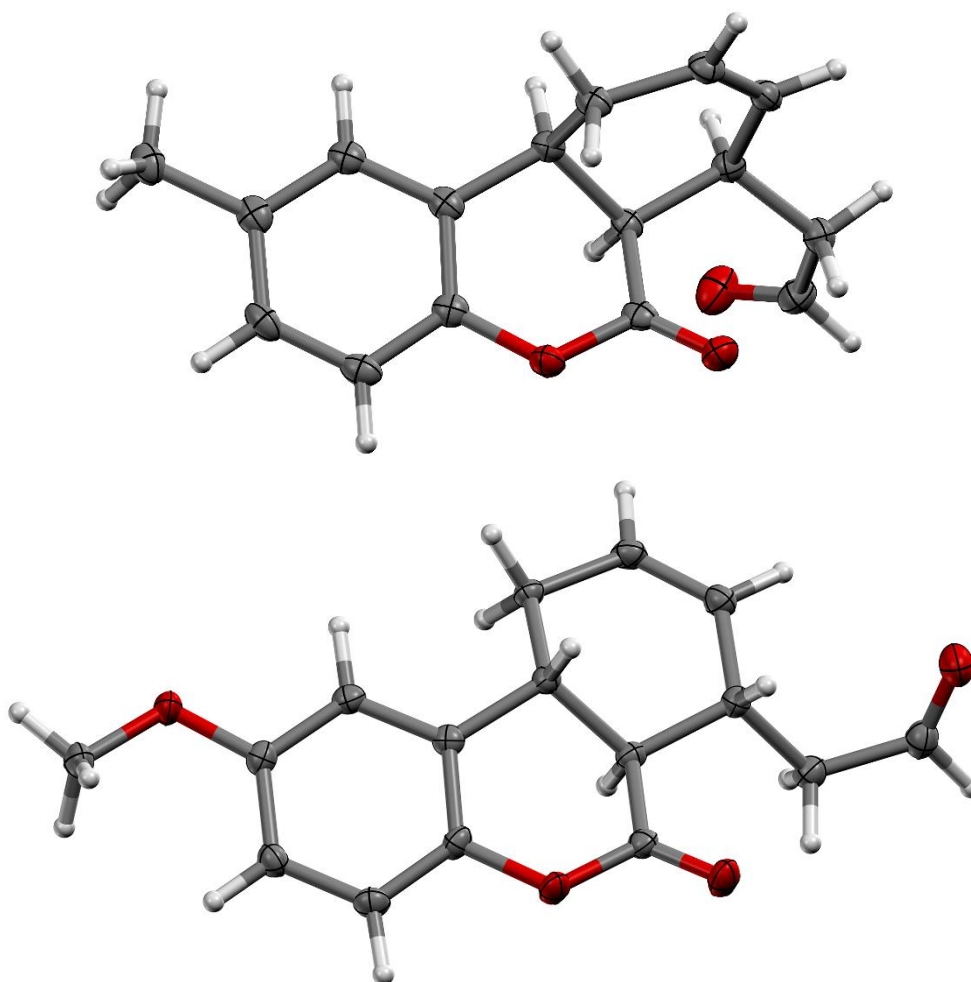

Figure X. The molecular structures of the compound major-*ent*-**3e** and minor-**3f**, showing 50% probability displacement ellipsoids. Hydrogen atoms are drawn with an arbitrary radius.

Single crystal X-ray diffraction data were collected at 100 K by the  $\omega$ -scan technique using a RIGAKU XtaLAB Synergy, Dualflex, Pilatus 300K diffractometer<sup>3</sup> with PhotonJet micro-focus X-ray Source Cu-K $\alpha$  ( $\lambda = 1.54184 \text{ \AA}$ ). Data collection, cell refinement, data reduction and absorption correction were performed using CrysAlis PRO software<sup>3</sup>. The crystal structure was solved by using direct methods with the SHELXT 2018/2 program<sup>4</sup>. Atomic scattering factors were taken from the International Tables for X-ray Crystallography. Positional parameters of

<sup>3</sup> Rigaku OD. CrysAlis PRO. Rigaku Oxford Diffraction Ltd, Yarnton, Oxfordshire, England, 2019

<sup>4</sup> G. M. Sheldrick, *Acta Cryst.* 2015, **A71**, 3

non-H-atoms were refined by a full-matrix least-squares method on  $F^2$  with anisotropic thermal parameters by using the SHELXL 2018/3 program<sup>5</sup>. All hydrogen atoms were placed in calculated positions (C–H = 0.95–1.00 Å) and included as riding contributions with isotropic displacement parameters set to 1.2–1.5 times the  $U_{eq}$  of the parent atom.

major-*ent-3e*: Formula  $C_{16}H_{16}O_3$ , monoclinic, space group  $P2_1$ ,  $Z = 2$ , unit cell constants  $a = 8.5399(1)$ ,  $b = 7.2817(1)$ ,  $c = 10.6201(1)$  Å,  $\beta = 105.546(1)^\circ$ ,  $V = 636.250(13)$  Å<sup>3</sup>. The integration of the data yielded a total of 15530 reflections with  $\theta$  angles in the range of 4.32 to 66.59°, of which 2246 unique ( $R_{int} = 1.60\%$ ) and 2241 were greater than  $2\sigma(F^2)$ . The final anisotropic full-matrix least-squares refinement on  $F^2$  with 174 parameters converged at  $R_1 = 2.17\%$  for the observed  $2\sigma(F^2)$  data and  $wR_2 = 5.56\%$  for all data. The largest peak in the final difference electron density synthesis was  $0.147 e \text{ \AA}^{-3}$  and the largest hole was  $-0.116 e \text{ \AA}^{-3}$ . The goodness-of-fit was 1.054. The absolute configuration was unambiguously determined from anomalous scattering, by calculating the  $x$  Flack parameter [4] of 0.029(2) using 1020 quotients.

minor-*3f*: Formula  $C_{16}H_{16}O_4$ , orthorhombic, space group  $P2_1$ ,  $Z = 2$ , unit cell constants  $a = 7.92142(4)$ ,  $b = 7.19257(4)$ ,  $c = 11.36141(5)$  Å,  $\beta = 97.7125(4)^\circ$ ,  $V = 641.465(6)$  Å<sup>3</sup>. The integration of the data yielded a total of 34348 reflections with  $\theta$  angles in the range of 5.64 to 68.17°, of which 2327 unique ( $R_{int} = 2.03\%$ ) and 2322 were greater than  $2\sigma(F^2)$ . The final anisotropic full-matrix least-squares refinement on  $F^2$  with 182 parameters converged at  $R_1 = 2.37\%$  for the observed  $2\sigma(F^2)$  data and  $wR_2 = 6.26\%$  for all data. The largest peak in the final difference electron density synthesis was  $0.199 e \text{ \AA}^{-3}$  and the largest hole was  $-0.189 e \text{ \AA}^{-3}$ . The goodness-of-fit was 1.006. The absolute configuration was unambiguously determined from anomalous scattering, by calculating the  $x$  Flack parameter<sup>6</sup> of 0.01(3) using 1046 quotients.

CCDC 1902497 (major-*ent-3e*) and 1896414 (minor-*3f*) contain the supplementary crystallographic data for this paper. These data can be obtained free of charge from The Cambridge Crystallographic Data Centre via [www.ccdc.cam.ac.uk/structures](http://www.ccdc.cam.ac.uk/structures).

---

<sup>5</sup> G. M. Sheldrick, *Acta Cryst.* 2015, **C71**, 3

<sup>6</sup> S. Parsons, H. D. Flack and T. Wagner, *Acta Cryst.* 2013, **B69**, 249

#### 4. Relative configuration assignment

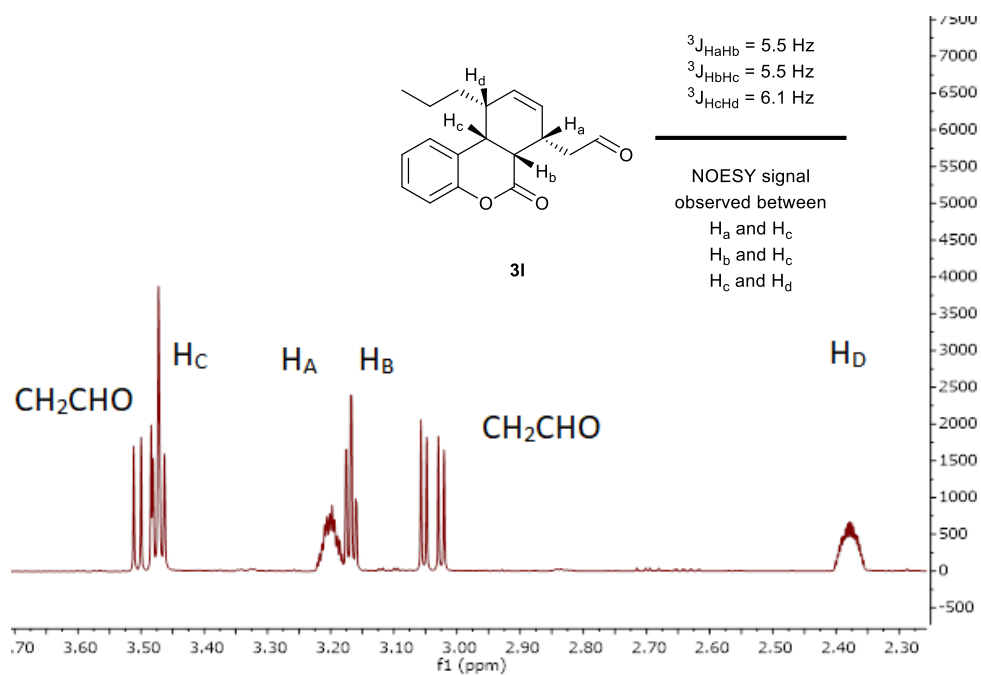

3.49 (dd,  $J = 19.6, 8.3 \text{ Hz}$ , 1H,  $\underline{CH_2}CHO$ ), 3.47 (t,  $J = 6.1 \text{ Hz}$ , 1H,  $H_c$ ), 3.22–3.17 (m, 1H,  $H_A$ ), 3.16 (td,  $J = 5.5, 1.1 \text{ Hz}$ , 1H,  $H_B$ ), 3.04 (ddd,  $J = 19.3, 6.3, 0.6 \text{ Hz}$ , 1H,  $\underline{CH_2}CHO$ ), 2.38 (dddd,  $J = 11.0, 6.3, 4.2, 2.0 \text{ Hz}$ , 1H,  $H_D$ ).

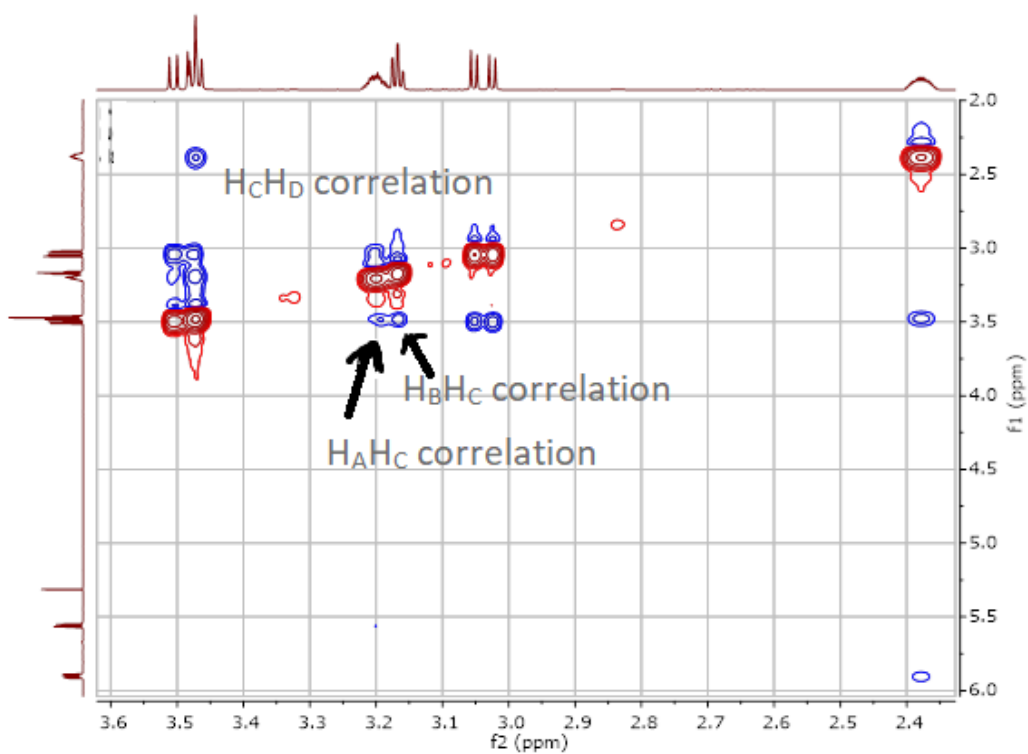

**5. Synthesis of (6*aS*,7*R*,10*R*,10*aR*)-7-((1,3-dioxolan-2-yl)methyl)-10-propyl-6*a*,7,8,9,10,10*a*-hexahydro-6*H*-benzo[*c*]chromen-6-one **51****

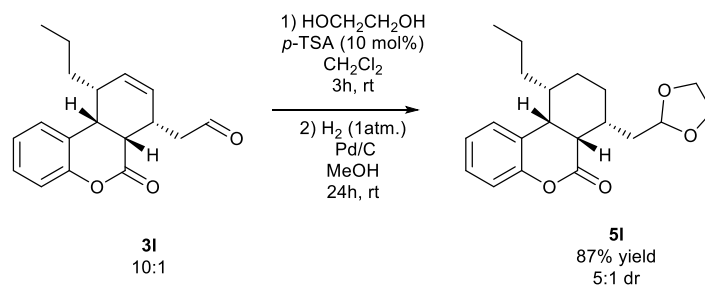

To a solution of the aldehyde **31** (0.15 mmol) in  $\text{CH}_2\text{Cl}_2$  (0.1 mL), ethylene glycol (0.30 mmol, 2 equiv.) and  $p\text{-TSA}\cdot\text{H}_2\text{O}$  (0.015 mmol, 0.1 equiv.) were added. The reaction mixture was stirred for 2h at room temperature after which it was complete as confirmed by  $^1\text{H}$  NMR spectroscopy. Hereafter,  $\text{CH}_2\text{Cl}_2$  (10 mL),  $\text{H}_2\text{O}$  (5 mL), and sat. aq.  $\text{NaHCO}_3$  (5 mL) were added and the phases were separated. The aqueous phase was extracted with  $\text{CH}_2\text{Cl}_2$  (3x10 mL) and the combined organic extracts were concentrated under reduced pressure. Then 10% Pd/C (28.4 mg, 50 w/w%) was added and the solution was subjected to hydrogenolysis (1 atm.) for 20h. Subsequently, the reaction mixture was filtered through a short pad of Celite using  $\text{CH}_3\text{OH}$  (50 mL) as eluent. After removal of the solvents under reduced pressure, the residue was purified by FC on silica gel (hexane:diethyl ether 9:1) to afford pure product **51** as white oil in 87% yield, 5:1 dr.  $^1\text{H}$  NMR (700 MHz,  $\text{CDCl}_3$ )  $\delta$  7.26 – 7.22 (m,  $1\text{H}_{\text{major} + \text{minor}}$ ), 7.13 (dd,  $J = 7.6, 1.8$  Hz,  $1\text{H}_{\text{major} + \text{minor}}$ ), 7.11 – 7.07 (m,  $1\text{H}_{\text{major} + \text{minor}}$ ), 7.01 (dd,  $J = 8.1, 1.2$  Hz,  $1\text{H}_{\text{major} + \text{minor}}$ ), 5.01 – 4.85 (m,  $1\text{H}_{\text{major} + \text{minor}}$ ), 3.99 – 3.86 (m,  $2\text{H}_{\text{major} + \text{minor}}$ ), 3.87 – 3.76 (m,  $2\text{H}_{\text{major} + \text{minor}}$ ), 3.19 – 3.05 (m,  $1\text{H}_{\text{major} + \text{minor}}$ ), 2.98 – 2.85 (m,  $1\text{H}_{\text{major}}$ ), 2.52 – 2.42 (m,  $1\text{H}_{\text{minor}}$ ), 2.34 (ddd,  $J = 14.4, 7.5, 5.3$  Hz,  $1\text{H}_{\text{major} + \text{minor}}$ ), 2.31 – 2.18 (m,  $2\text{H}_{\text{minor}}$ ), 2.16 – 2.11 (m,  $1\text{H}_{\text{minor}}$ ), 2.09 – 2.03 (m,  $1\text{H}_{\text{major} + \text{minor}}$ ), 1.97 – 1.89 (m,  $2\text{H}_{\text{major}}$ ), 1.85 (dt,  $J = 11.8, 4.7, 2.4$  Hz,  $1\text{H}_{\text{major}}$ ), 1.79 (qd,  $J = 13.3, 3.2$  Hz,  $1\text{H}_{\text{major}}$ ), 1.72 (dt,  $J = 15.2, 7.4$  Hz,  $1\text{H}_{\text{minor}}$ ), 1.65 – 1.55 (m,  $1\text{H}_{\text{major} + \text{minor}}$ ), 1.55 – 1.46 (m,  $1\text{H}_{\text{major}}$ ), 1.37 – 1.22 (m,  $2\text{H}_{\text{major} + \text{minor}}$ ), 1.20 – 1.11 (m,  $1\text{H}_{\text{minor}}$ ), 0.96 – 0.85 (m,  $1\text{H}_{\text{major} + \text{minor}}$ ), 0.85 – 0.77 (m,  $1\text{H}_{\text{major}}$ ), 0.75 (t,  $J = 7.4$  Hz,  $3\text{H}_{\text{minor}}$ ), 0.68 (t,  $J = 7.2$  Hz,  $3\text{H}_{\text{major}}$ ).  $^{13}\text{C}$  NMR (176 MHz,  $\text{CDCl}_3$ )  $\delta_{\text{major}}$  170.1, 151.9, 128.1, 127.5, 127.0, 124.1, 116.4, 103.8, 64.8, 64.7, 44.0, 40.5, 38.9, 37.5, 35.4, 28.8, 27.4, 22.9, 21.3, 13.9.  $\delta_{\text{minor}}$  168.8, 150.8, 135.1, 129.4, 128.5, 123.9, 116.7, 103.8, 64.8, 64.7, 42.1, 42.0, 38.9, 37.6, 36.4, 33.4, 31.9, 29.1, 21.4, 13.7. HRMS: calculated for  $[\text{C}_{20}\text{H}_{26}\text{O}_4 + \text{H}^+]$ : 331.1904, found: 331.1913.

**6. Synthesis of (6a*S*,7*S*,10*R*,10a*R*)-7-(2-hydroxyethyl)-10-propyl-6a,7,10,10a-tetrahydro-6*H*-benzo[*c*]chromen-6-one **6I****

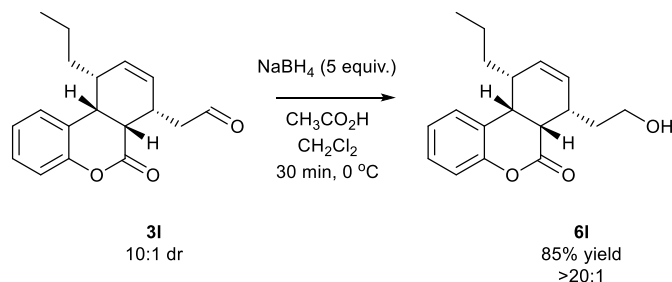

In an ordinary 4 mL glass vial, equipped with magnetic stirring bar aldehyde **3I** (1 equiv, 0.1 mmol) was dissolved in CH<sub>2</sub>Cl<sub>2</sub> (0.2 mL) and glacial acetic acid (0.4 mL) and the resulting solution was cooled in cold water bath. Subsequently, sodium borohydride (5 equiv, 19 mg) was added, and reaction was stirred for 30 min. at room temperature. Reaction was quenched with water (5 mL), extracted with dichloromethane (3x10 mL). Combined organic layers were washed with saturated aqueous solution of sodium bicarbonate (1x5 mL) and water (1x5 mL), dried over anhydrous MgSO<sub>4</sub>, filtered and concentrated in *vacuo*. Pure product **6I** was isolated by flash chromatography on silica gel (eluent: hexane:acetone 80:20) as a white oil in 85% yield, >20:1 dr. <sup>1</sup>H NMR (700 MHz, CDCl<sub>3</sub>) δ 7.25 – 7.22 (m, 1H), 7.13 (dd, J = 7.5, 1.7 Hz, 1H), 7.08 (td, J = 7.4, 1.2 Hz, 1H), 7.01 (dd, J = 8.2, 1.1 Hz, 1H), 5.88 – 5.76 (m, 1H), 5.70 – 5.60 (m, 1H), 3.74 (ddd, J = 6.7, 5.6, 1.4 Hz, 2H), 3.38 (dd, J = 7.2, 5.5 Hz, 1H), 2.93 (td, J = 5.4, 1.1 Hz, 1H), 2.75 (dtt, J = 10.2, 5.0, 2.6 Hz, 1H), 2.33 (dtt, J = 11.5, 7.2, 2.3 Hz, 1H), 2.28 (dddd, J = 14.1, 8.4, 6.5, 5.6 Hz, 1H), 2.09 – 2.03 (m, 1H), 1.30 – 1.36 (m, 2H), 1.11 – 1.05 (m, 1H), 1.01 – 0.93 (m, 1H), 0.90 – 0.86 (m, 1H), 0.66 (t, J = 7.3 Hz, 3H). <sup>13</sup>C NMR (176 MHz, CDCl<sub>3</sub>) δ 169.7, 152.3, 128.6, 128.6, 128.3, 127.5, 127.2, 124.1, 116.5, 60.9, 40.7, 39.1, 38.0, 35.2, 33.6, 33.0, 21.0, 13.9. HRMS: calculated for [C<sub>18</sub>H<sub>22</sub>O<sub>3</sub>+H<sup>+</sup>]: 287.1642, found: 287.1639.

## 7. NMR Data

(3a) 2-((6*S*,7*S*,10*aR*)-6-Oxo-6a,7,10,10a-tetrahydro-6*H*-benzo[*c*]chromen-7-yl)acetaldehyde

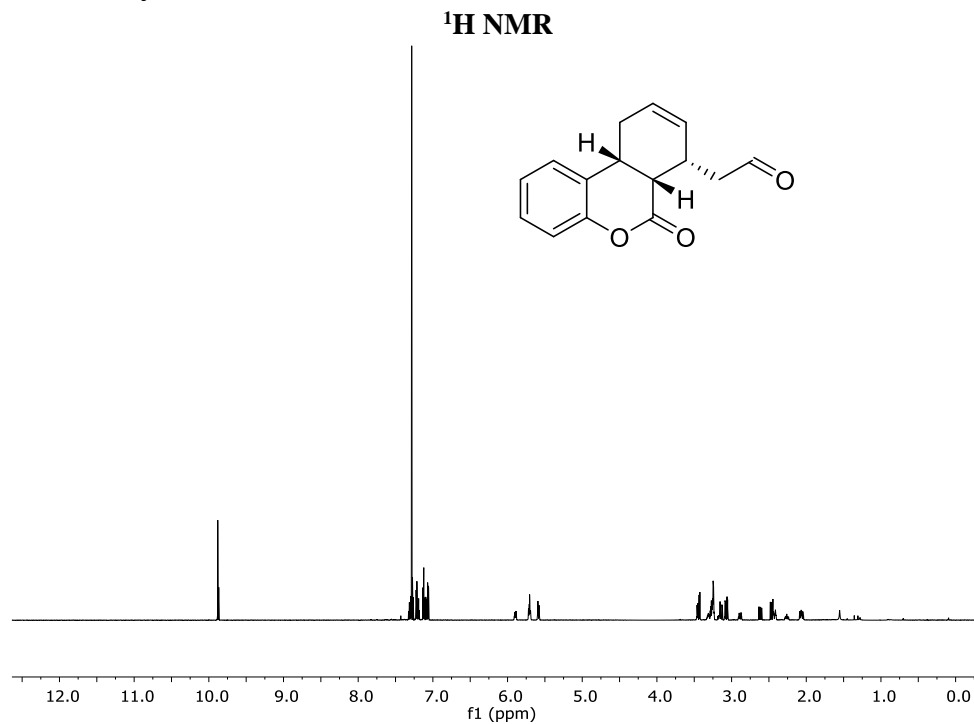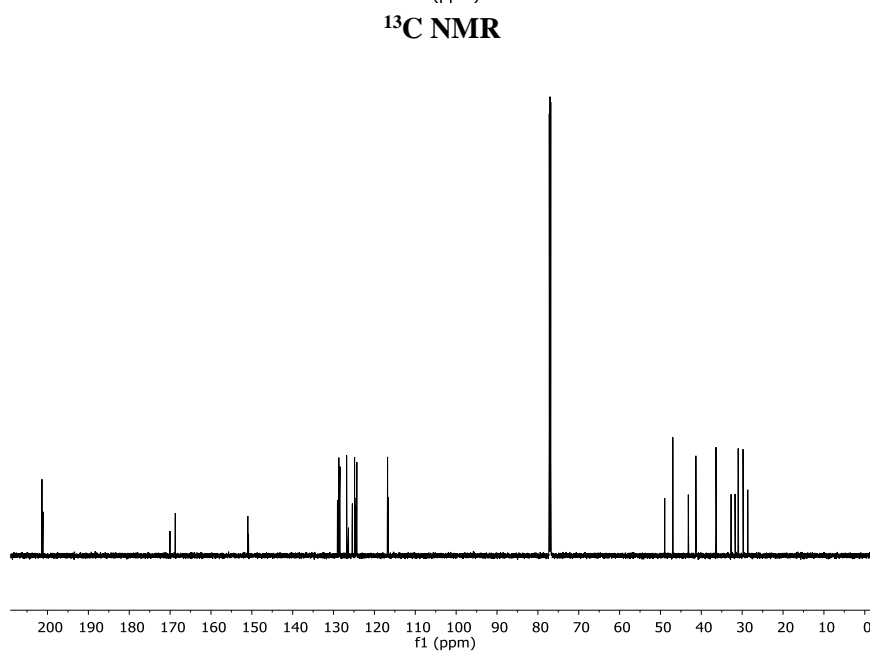

(3b) 2-((6a*S*,7*S*,10a*R*)-2-Fluoro-6-oxo-6a,7,10,10a-tetrahydro-6*H*-benzo[*c*]chromen-7-yl)acetaldehyde

$^1\text{H}$  NMR

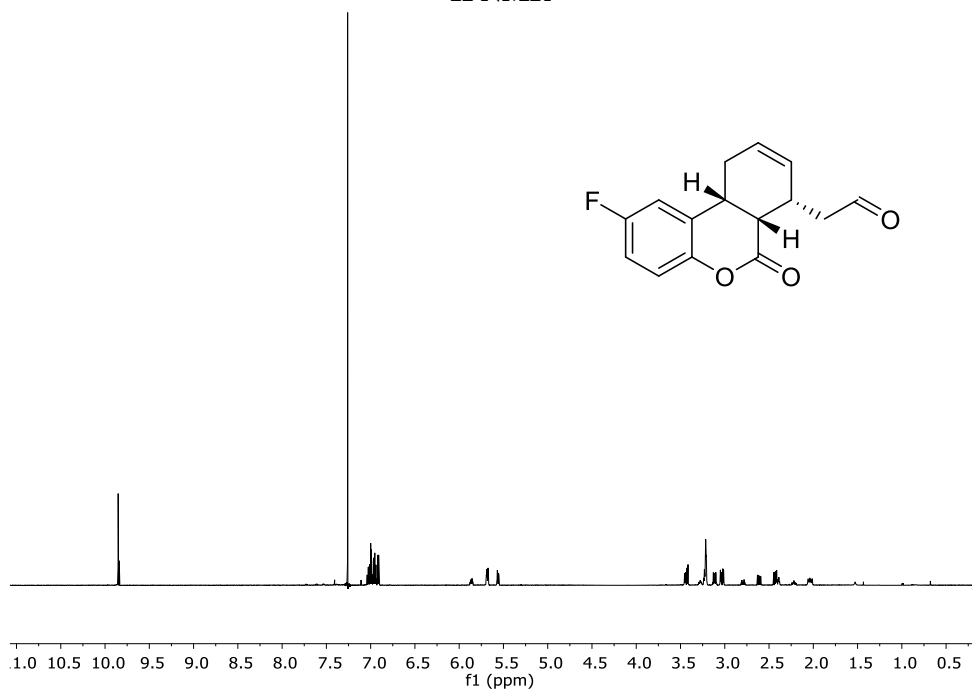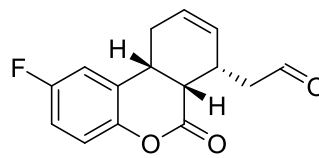

$^{13}\text{C}$  NMR

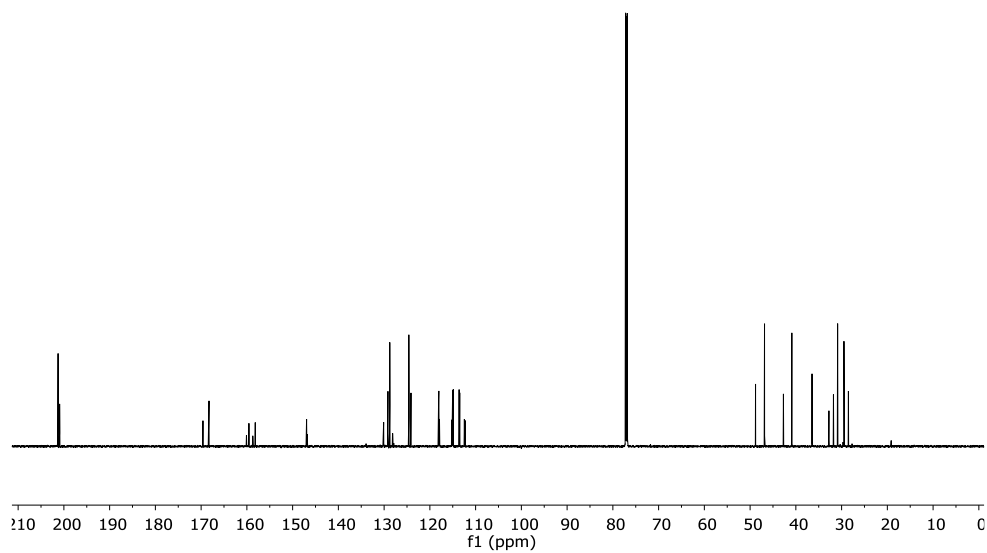

(3c) 2-((6*S*,7*S*,10*aR*)-2-Chloro-6-oxo-6a,7,10,10a-tetrahydro-6*H*-benzo[*c*]chromen-7-yl)acetaldehyde

$^1\text{H}$  NMR

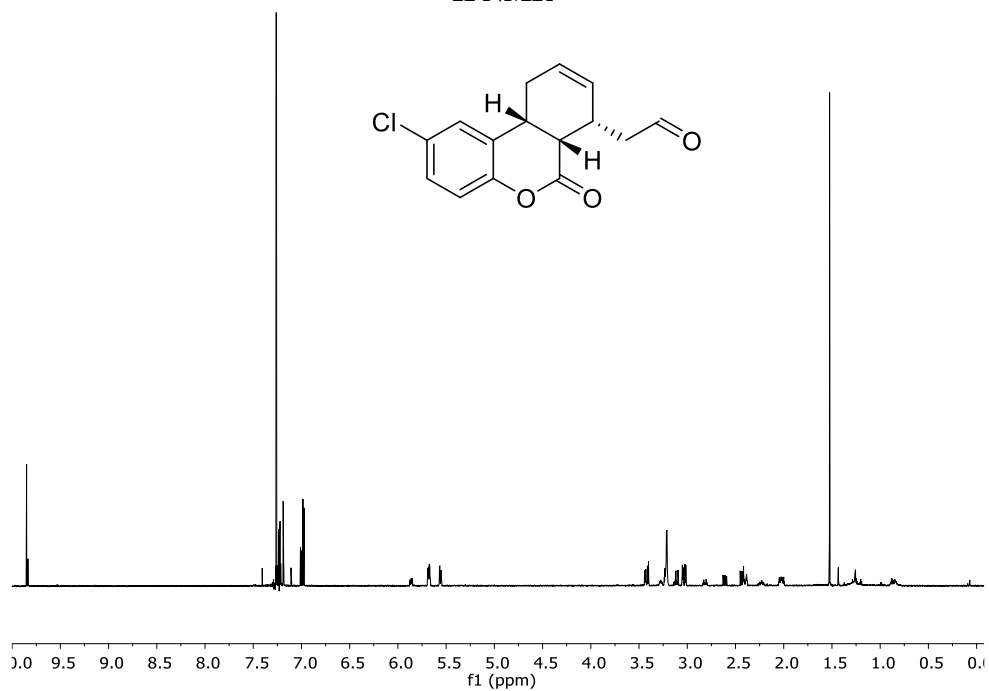

$^{13}\text{C}$  NMR

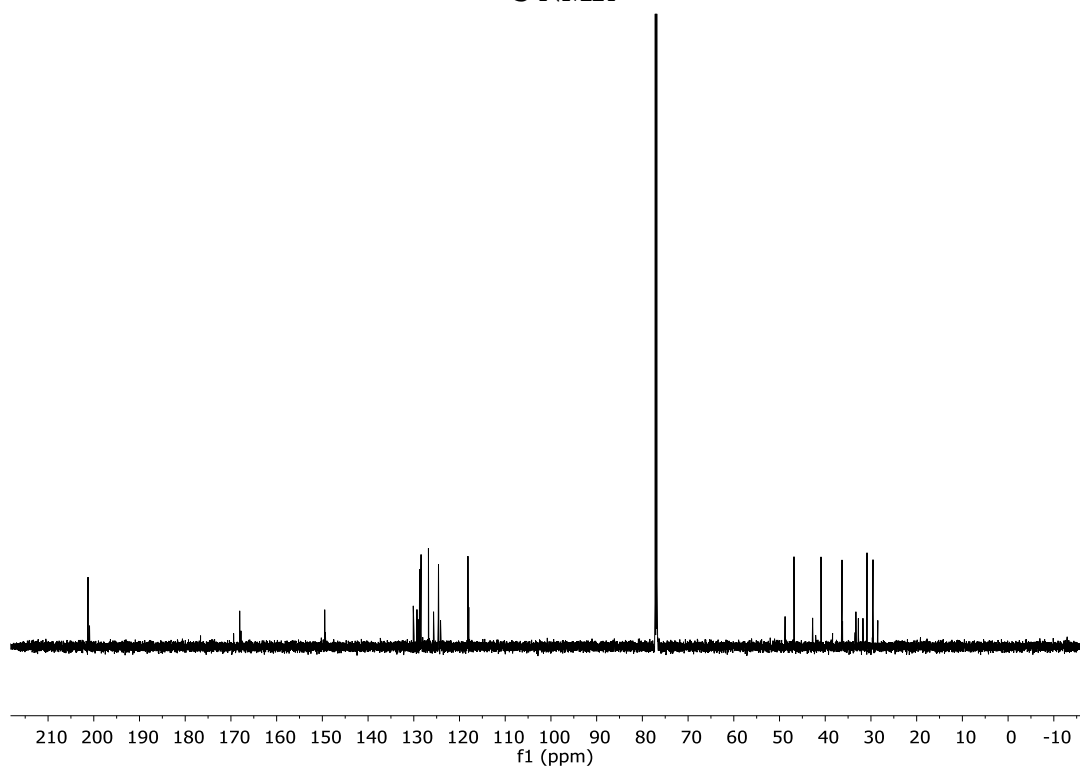



(3d) 2-((6*S*,7*S*,10*aR*)-2-Bromo-6-oxo-6a,7,10,10a-tetrahydro-6*H*-benzo[*c*]chromen-7-yl)acetaldehyde  
<sup>1</sup>H NMR

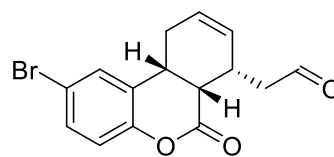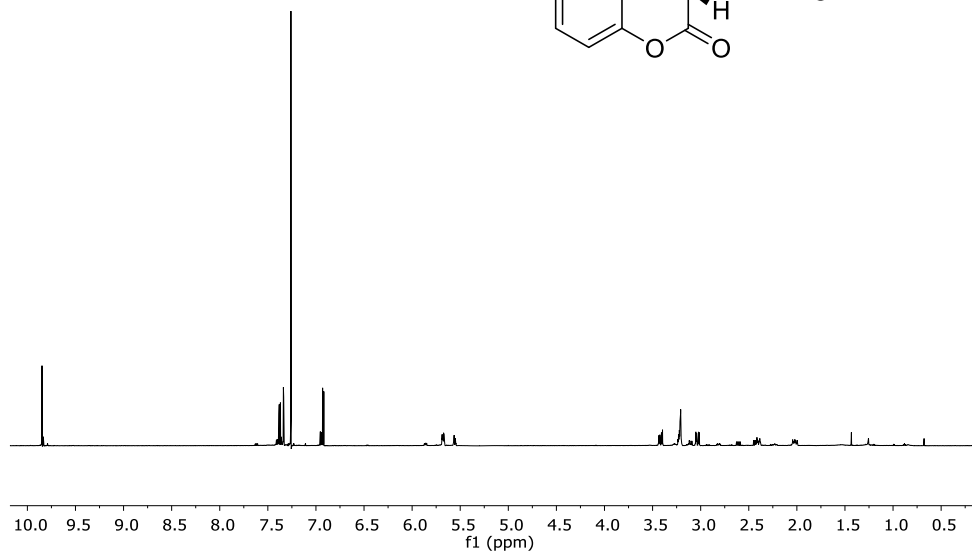

<sup>13</sup>C NMR

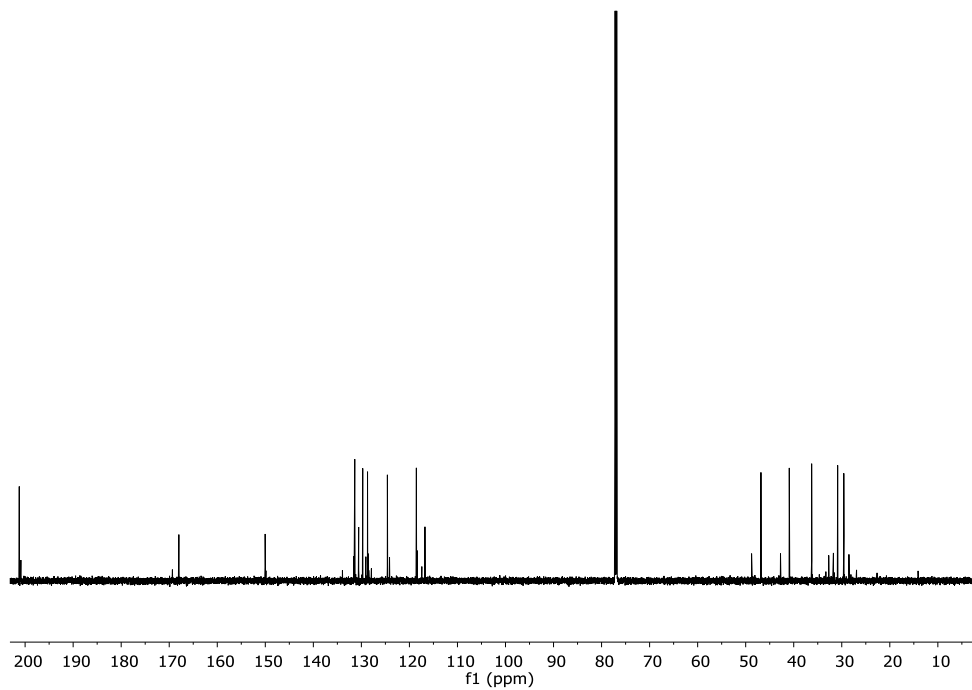

(3e) 2-((6a*S*,7*S*,10a*R*)-2-Methyl-6-oxo-6a,7,10,10a-tetrahydro-6*H*-benzo[*c*]chromen-7-yl)acetaldehyde

$^1\text{H}$  NMR

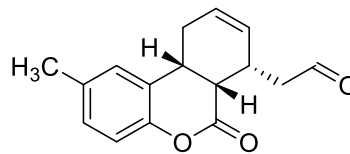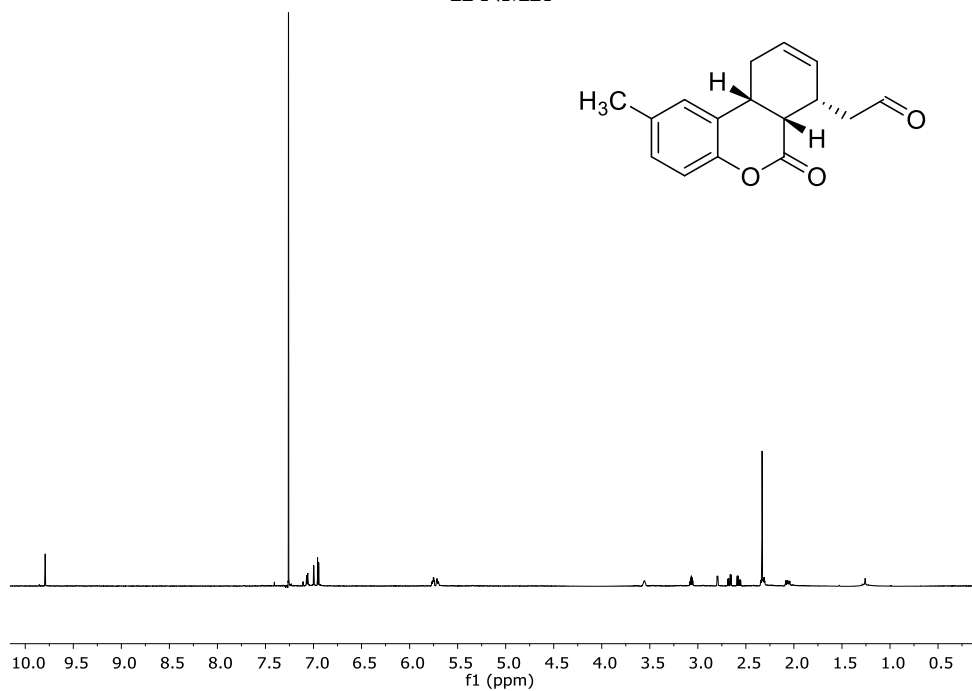

$^{13}\text{C}$  NMR

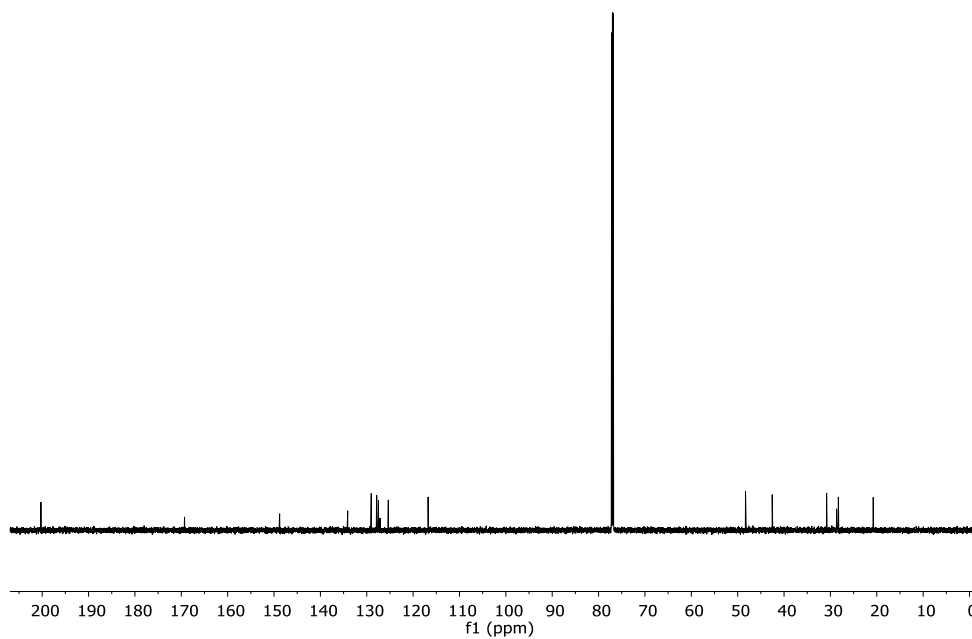

**(3f) 2-((6*S*,7*S*,10*aR*)-2-Methoxy-6-oxo-6a,7,10,10a-tetrahydro-6*H*-benzo[*c*]chromen-7-yl)acetaldehyde**  
**<sup>1</sup>H NMR**

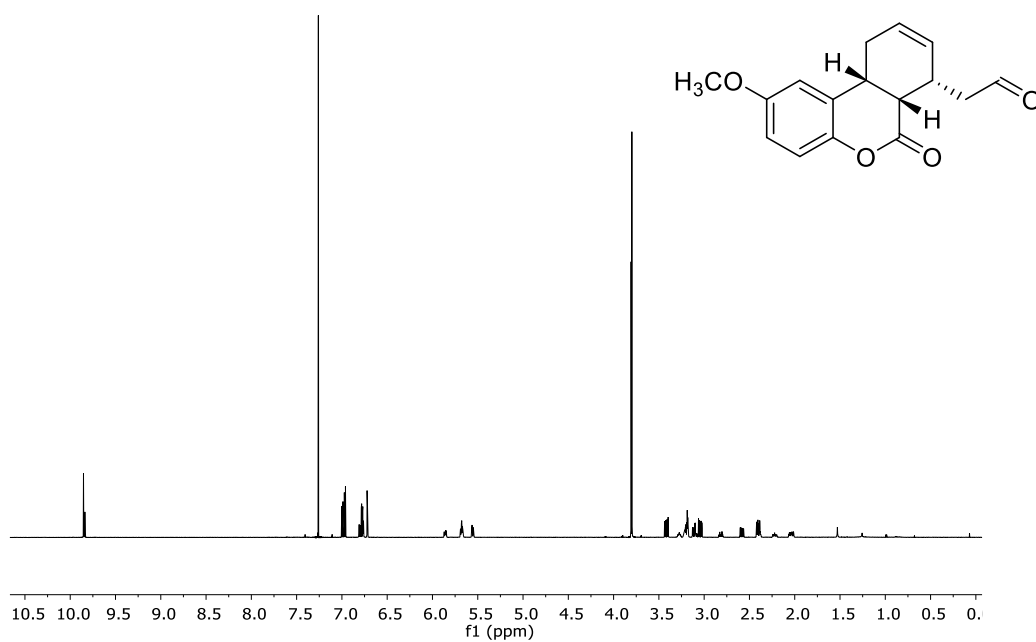

**<sup>13</sup>C NMR**

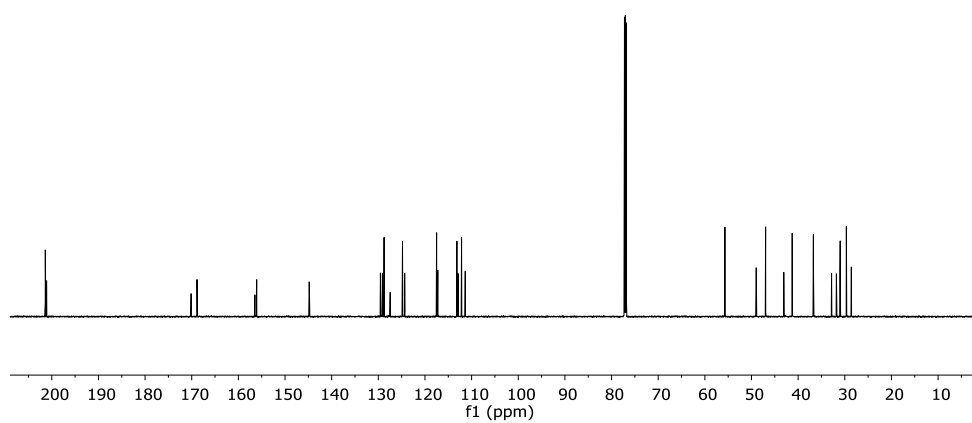

**(3g) 2-((6a*S*,7*S*,10a*R*)-3-Methoxy-6-oxo-6a,7,10a-tetrahydro-6*H*-benzo[*c*]chromen-7-yl)acetaldehyde**  
**<sup>1</sup>H NMR**

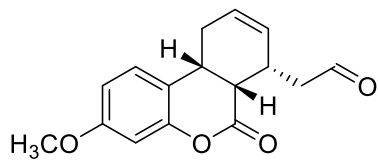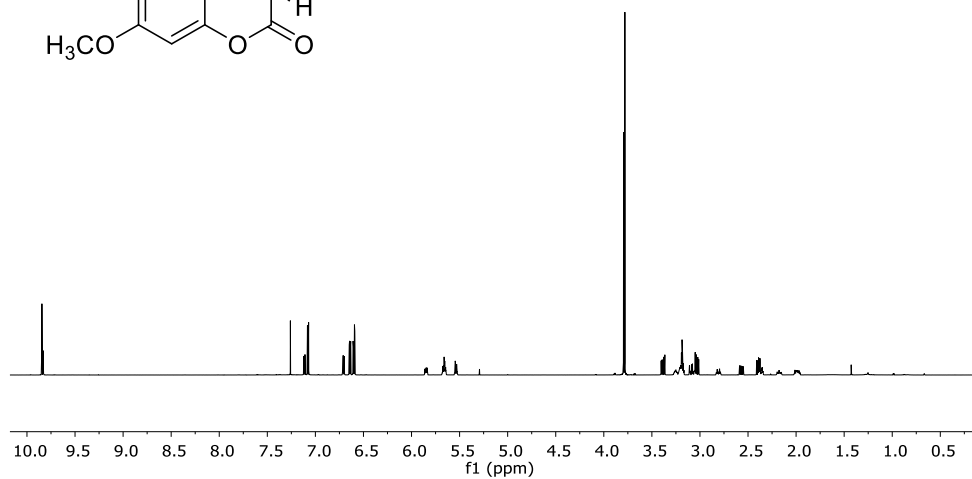

**<sup>13</sup>C NMR**

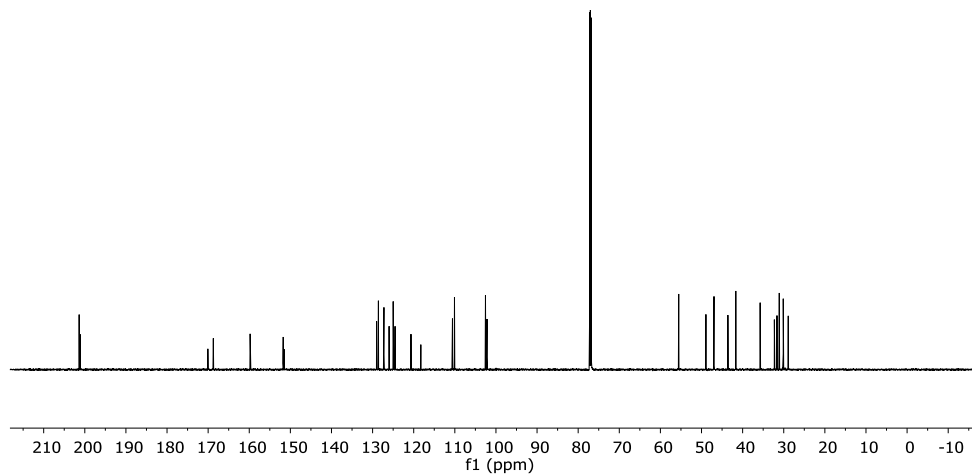

**(3h) 2-((6a*S*,7*S*,10a*R*)-6-Oxo-6a,7,10,10a-tetrahydro-6*H*-dibenzo[*c,h*]chromen-7-yl)acetaldehyde**  
**<sup>1</sup>H NMR**

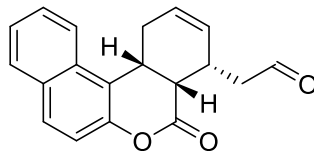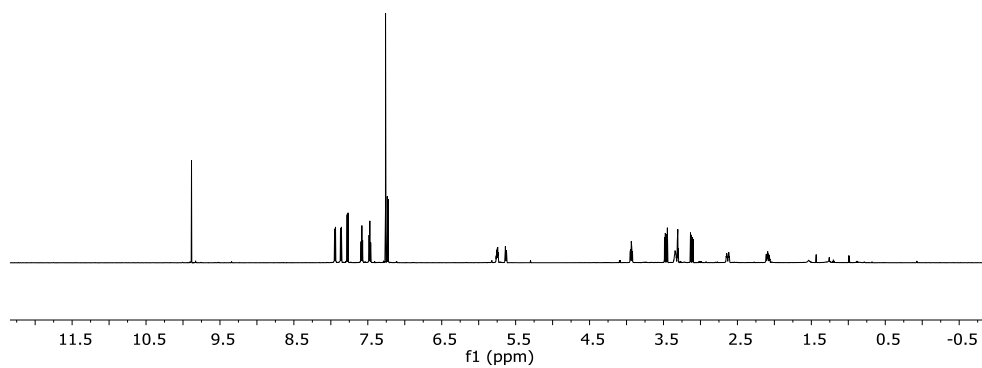

**<sup>13</sup>C NMR**

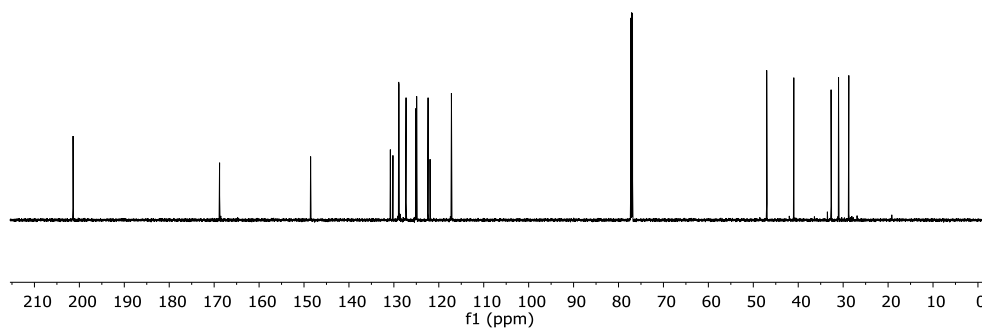

(3i) 2-((6*S*,7*S*,10*aR*)-2,4-Dichloro-6-oxo-6a,7,10,10a-tetrahydro-6*H*-benzo[*c*]chromen-7-yl)acetaldehyde

<sup>1</sup>H NMR

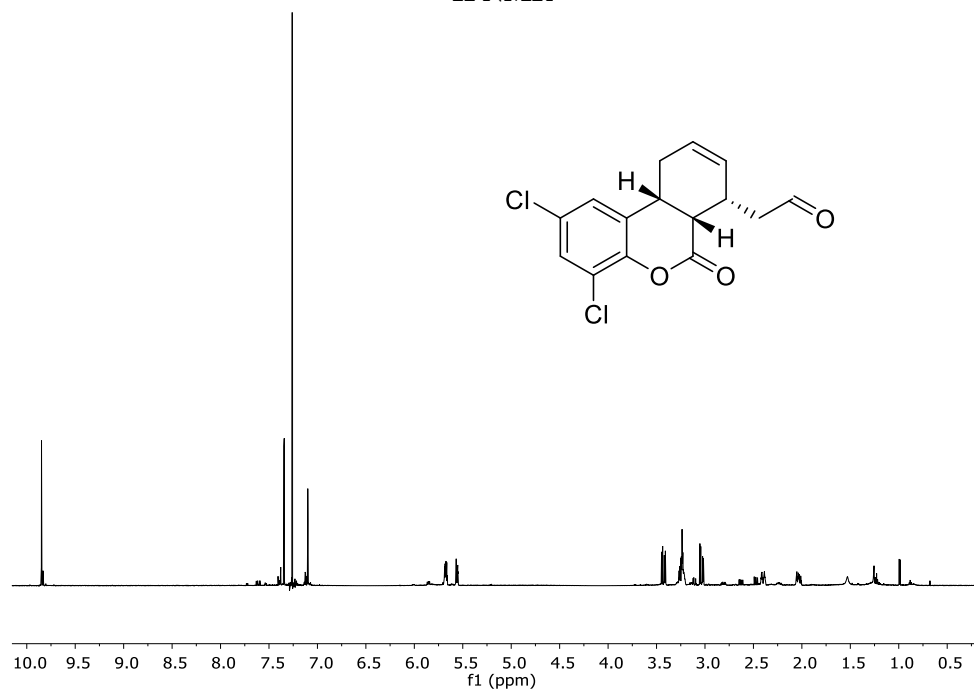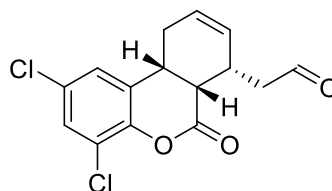

<sup>13</sup>C NMR

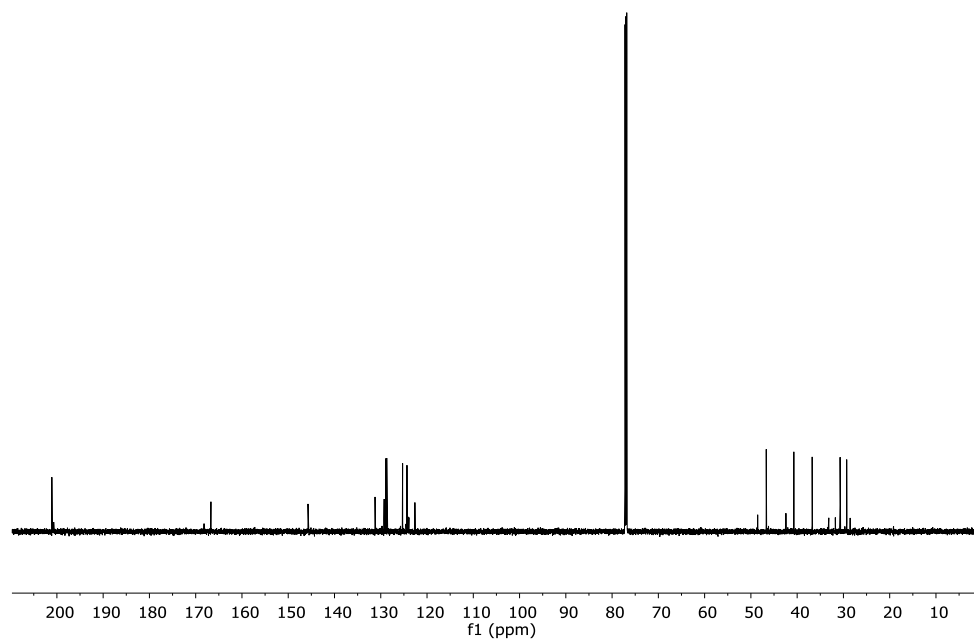

(3j) 2-((6*S*,7*S*,10*aR*)-9-Methyl-6-oxo-6a,7,10,10a-tetrahydro-6*H*-benzo[*c*]chromen-7-yl)acetaldehyde  
<sup>1</sup>H NMR

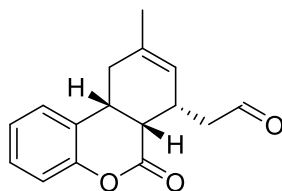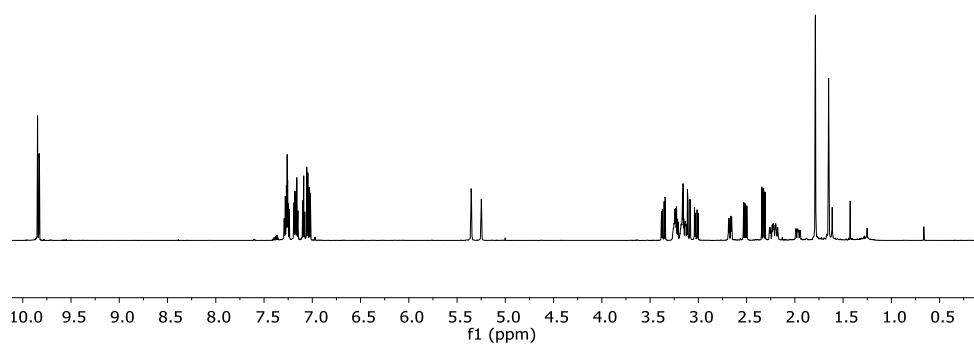

<sup>13</sup>C NMR

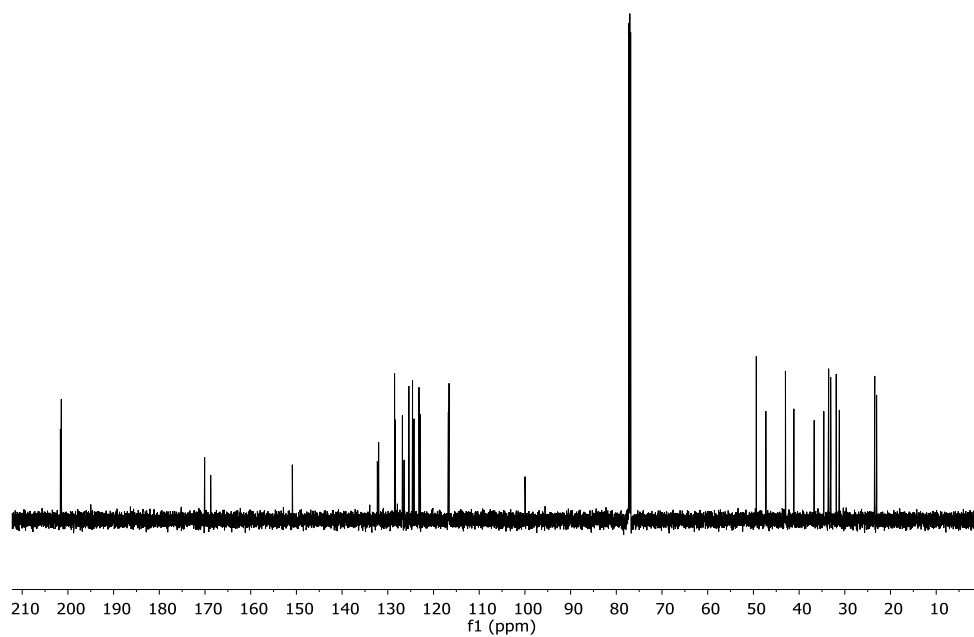

(3k) 2-((6*S*,7*R*,10*aR*)-8,9-Dimethyl-6-oxo-6a,7,10,10a-tetrahydro-6*H*-benzo[*c*]chromen-7-yl)acetaldehyde  
<sup>1</sup>H NMR

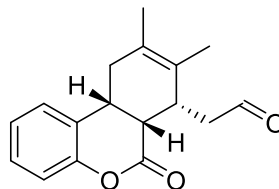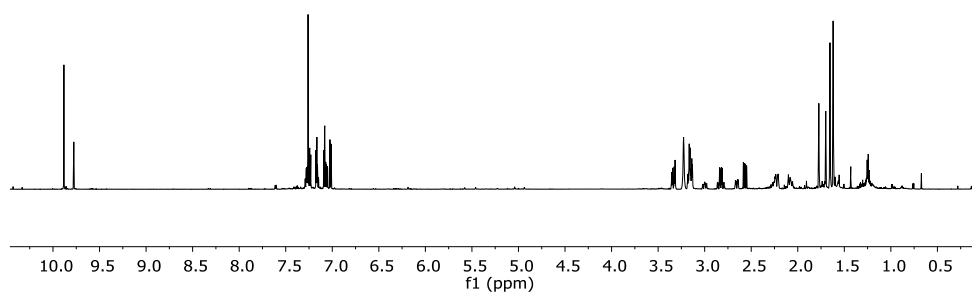

<sup>13</sup>C NMR

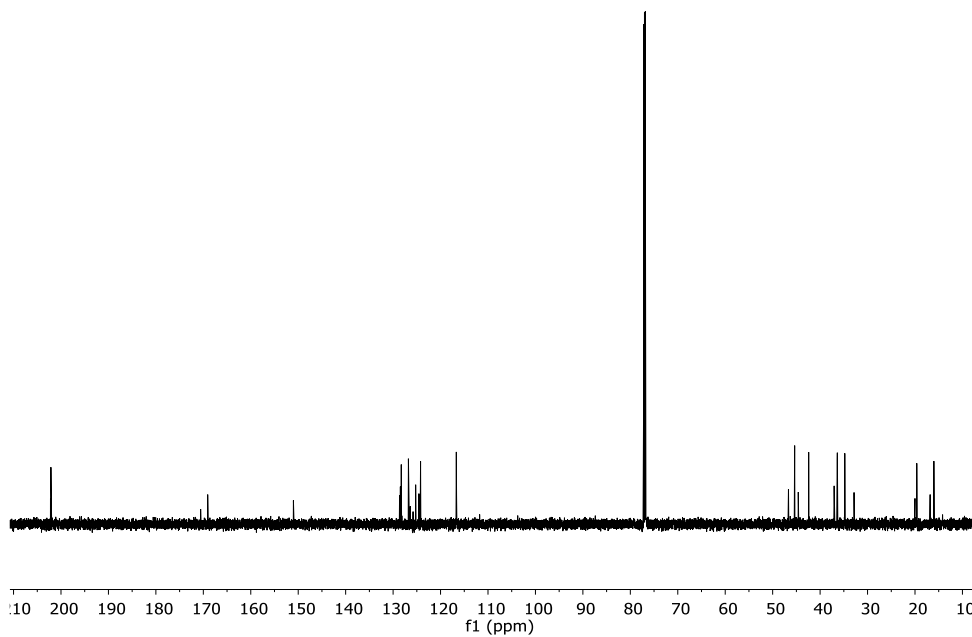



(3l) 2-((6*S*,7*S*,10*R*,10*aR*)-6-Oxo-10-propyl-6*a*,7,10,10*a*-tetrahydro-6*H*-benzo[*c*]chromen-7-yl)acetaldehyde  
<sup>1</sup>H NMR

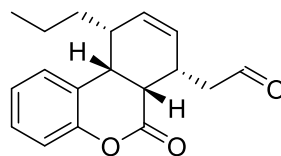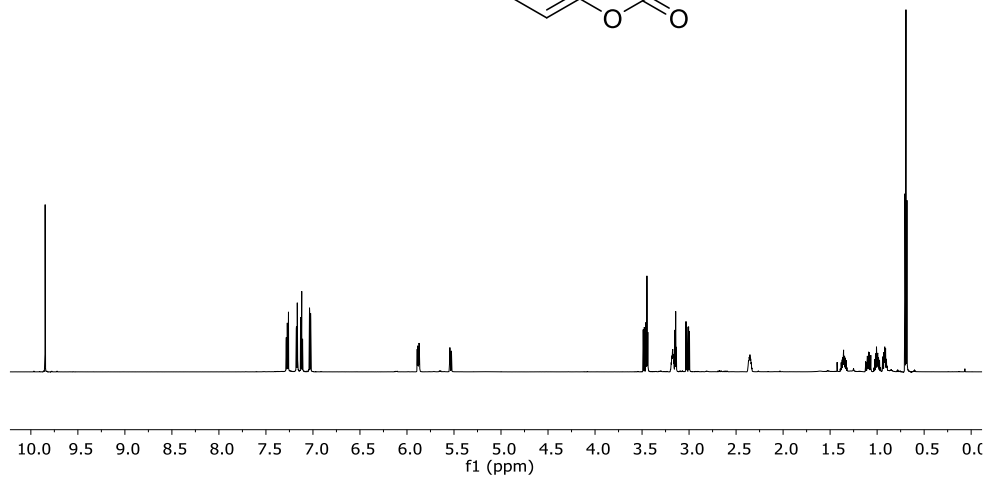

<sup>13</sup>C NMR

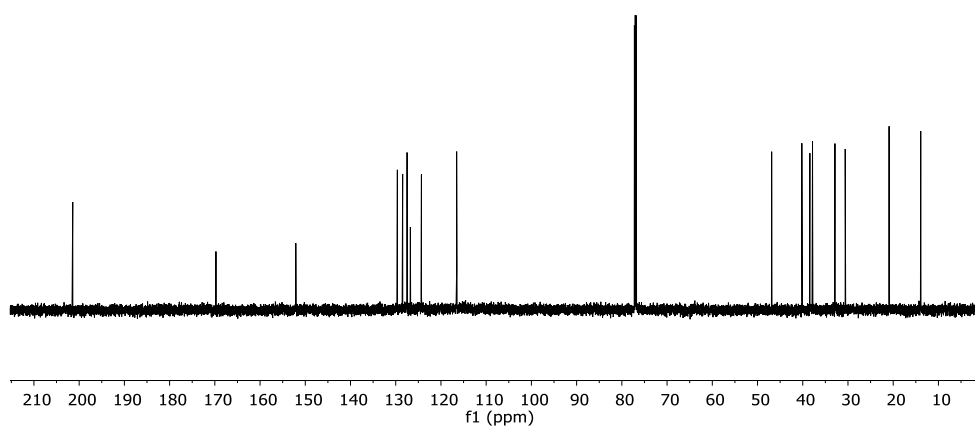

**(3m) 2-((6a*S*,7*S*,12a*S*,12b*R*)-6-Oxo-6a,7,9,10,11,12,12a,12b-octahydro-6*H*-naphtho[2,1-  
c]chromen-7-yl)acetaldehyde**

**<sup>1</sup>H NMR**

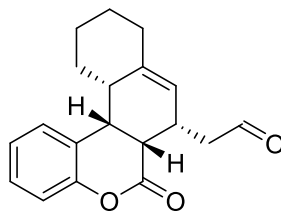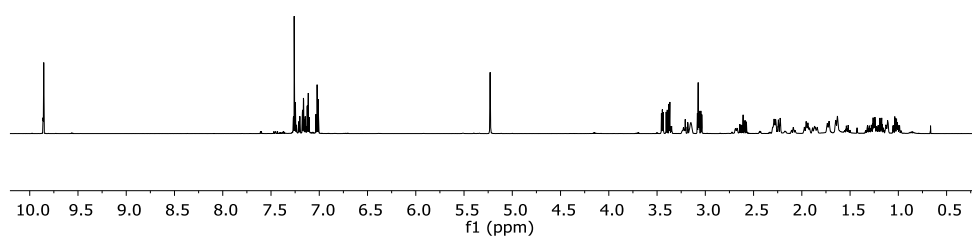

**<sup>13</sup>C NMR**

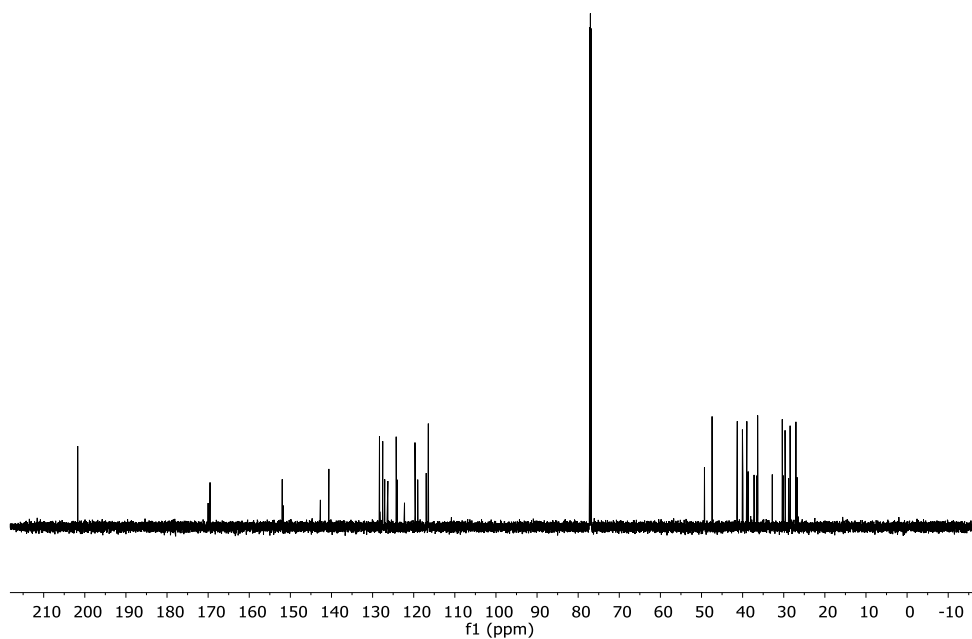

**(5I) (6*S*,7*R*,10*R*,10*aR*)-7-((1,3-Dioxolan-2-yl)methyl)-10-propyl-6*a*,7,8,9,10,10*a*-hexahydro-6*H*-benzo[*c*]chromen-6-one**

**<sup>1</sup>H NMR**

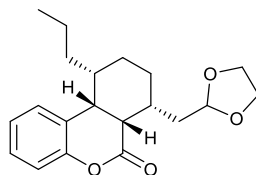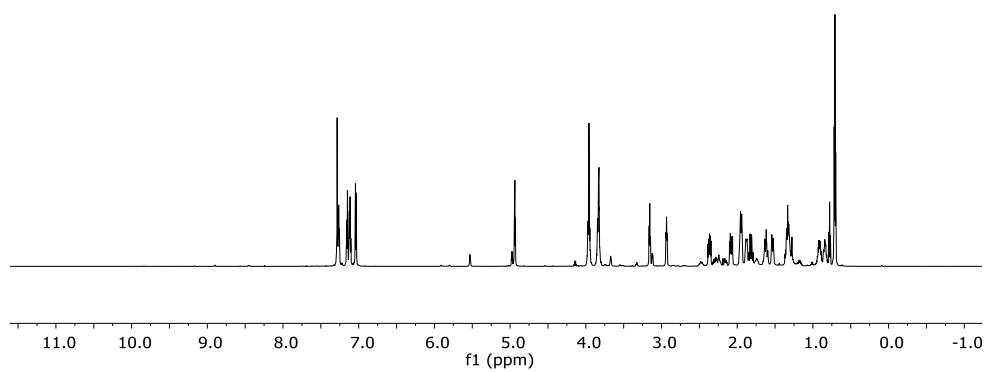

**<sup>13</sup>C NMR**

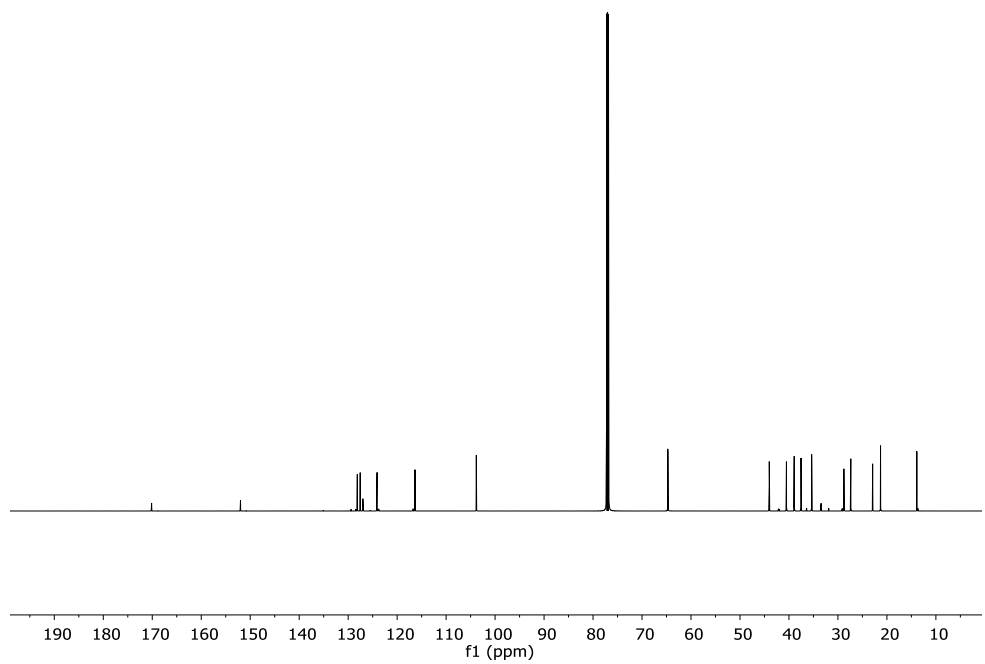

**(6l) (6*S*,7*S*,10*R*,10*aR*)-7-(2-Hydroxyethyl)-10-propyl-6*a*,7,10,10*a*-tetrahydro-6*H*-benzo[*c*]chromen-6-one**

**<sup>1</sup>H NMR**

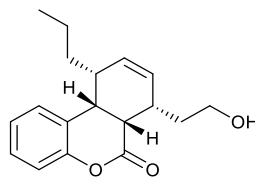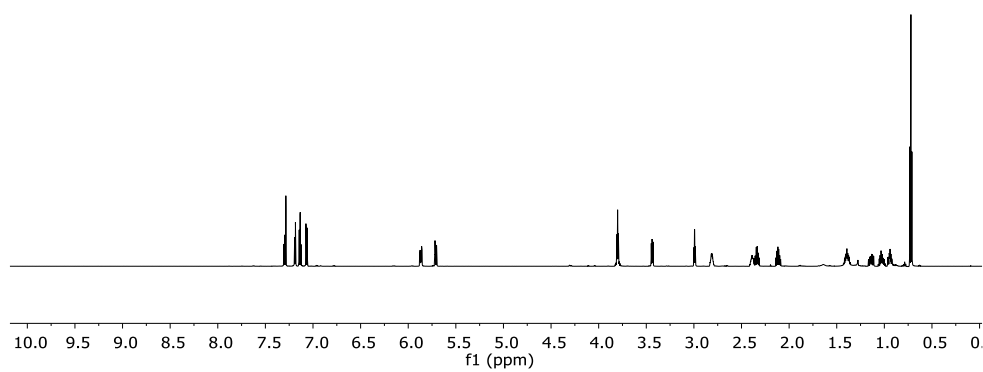

**<sup>13</sup>C NMR**

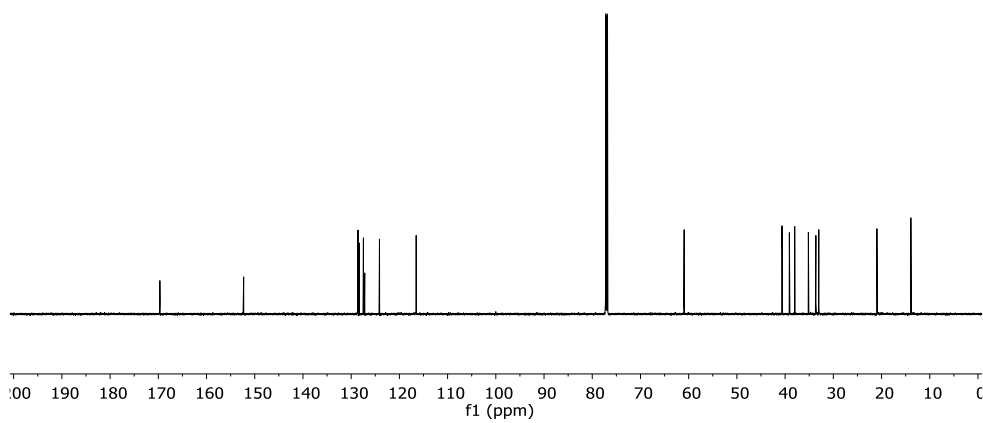

#### 4. HPLC traces

##### (3a) 2-((6*aS*,7*S*,10*aR*)-6-Oxo-6*a*,7,10,10*a*-tetrahydro-6*H*-benzo[*c*]chromen-7-yl)acetaldehyde

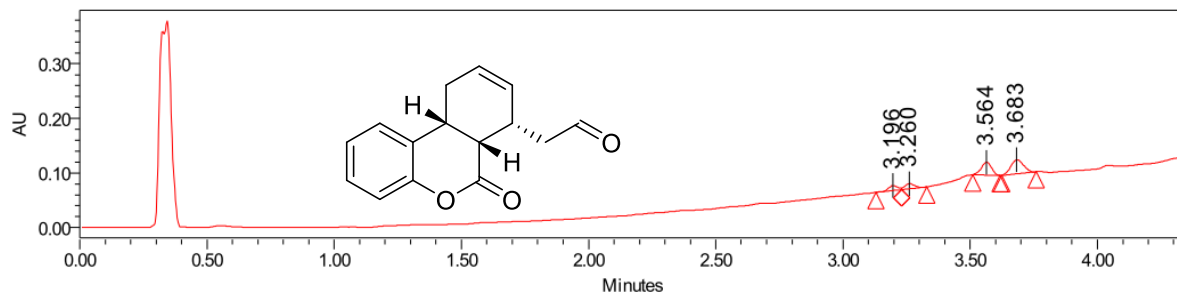

##### Major diastereoisomer

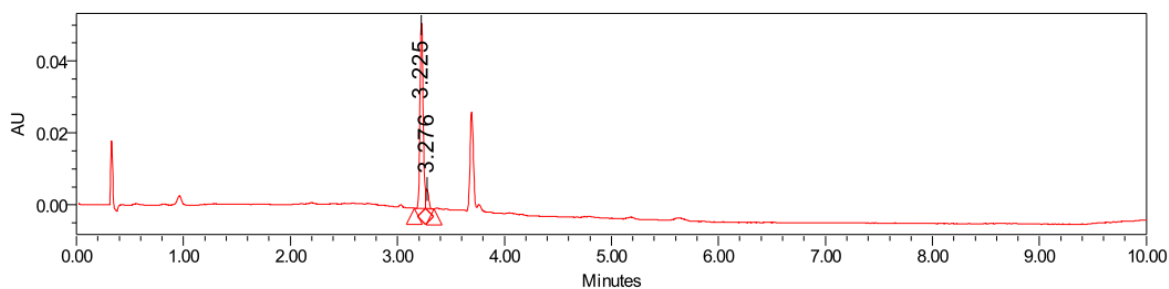

|   | RT    | Area   | % Area | Height |
|---|-------|--------|--------|--------|
| 1 | 3.225 | 106960 | 93.48  | 51734  |
| 2 | 3.276 | 9956   | 6.52   | 5467   |

##### Minor diastereoisomer

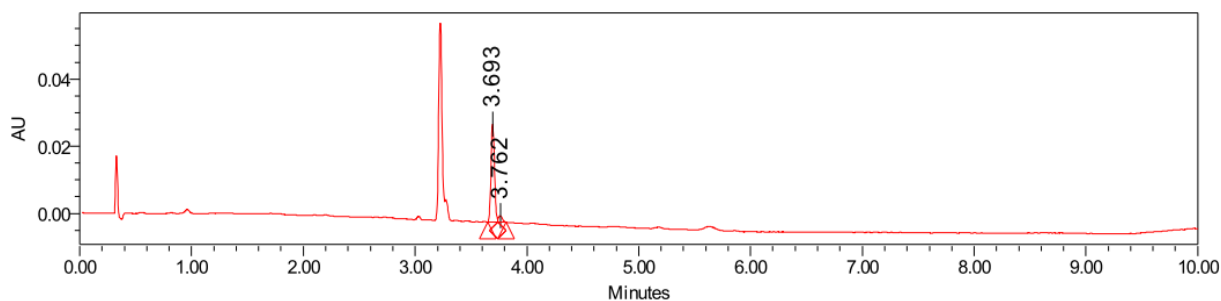

|   | RT    | Area  | % Area | Height |
|---|-------|-------|--------|--------|
| 1 | 3.693 | 62893 | 96.52  | 29137  |
| 2 | 3.762 | 4360  | 3.48   | 1901   |

**(3b) 2-((6a*S*,7*S*,10a*R*)-2-Fluoro-6-oxo-6a,7,10,10a-tetrahydro-6*H*-benzo[*c*]chromen-7-yl)acetaldehyde**

**Major diastereoisomer**

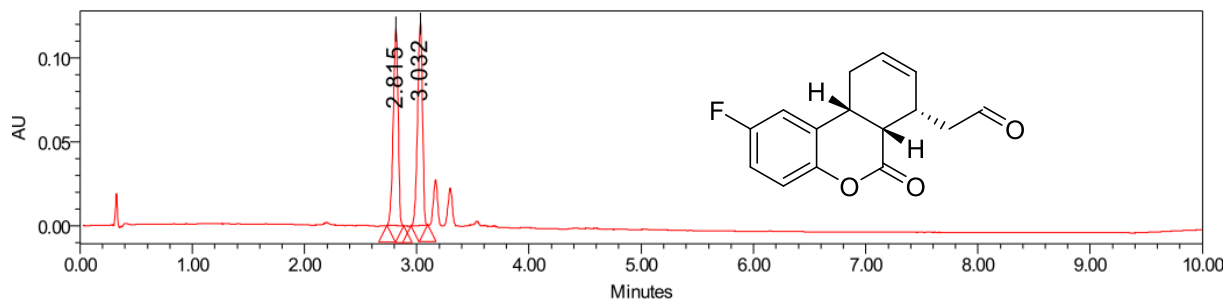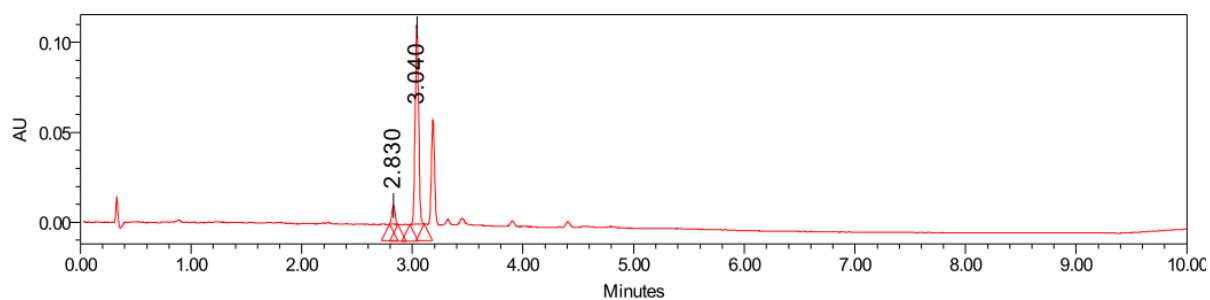

|   | RT    | Area   | % Area | Height |
|---|-------|--------|--------|--------|
| 1 | 2.830 | 21165  | 8.14   | 10419  |
| 2 | 3.040 | 238691 | 91.86  | 110578 |

**Minor diastereoisomer**

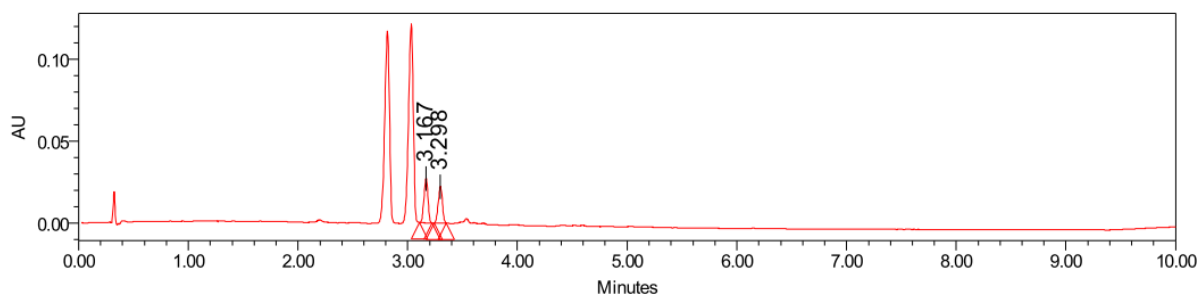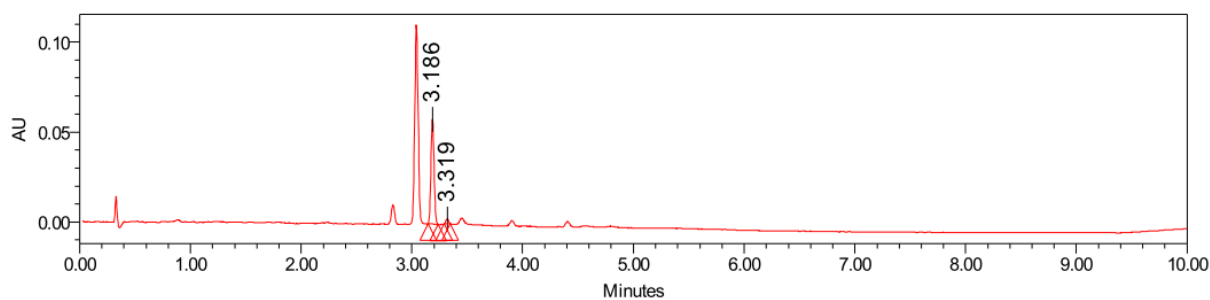

|   | RT    | Area   | % Area | Height |
|---|-------|--------|--------|--------|
| 1 | 3.186 | 115153 | 96.07  | 58432  |
| 2 | 3.319 | 4709   | 3.93   | 2713   |

**(3c) 2-((6a*S*,7*S*,10a*R*)-2-Chloro-6-oxo-6a,7,10,10a-tetrahydro-6*H*-benzo[*c*]chromen-7-yl)acetaldehyde**

**Major diastereoisomer**

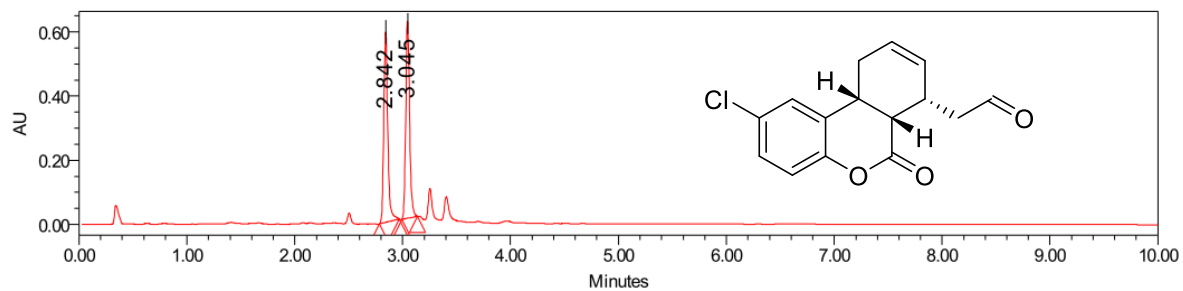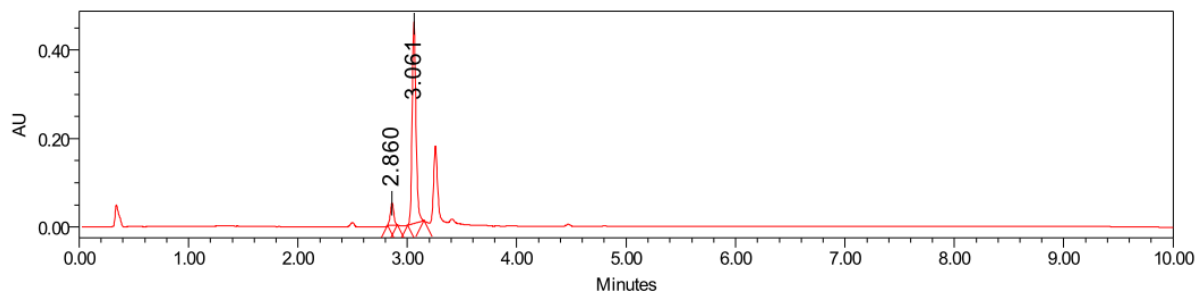

|   | RT    | Area    | % Area | Height |
|---|-------|---------|--------|--------|
| 1 | 2.860 | 109570  | 8.99   | 49881  |
| 2 | 3.061 | 1108580 | 91.01  | 456789 |

**Minor diastereoisomer**

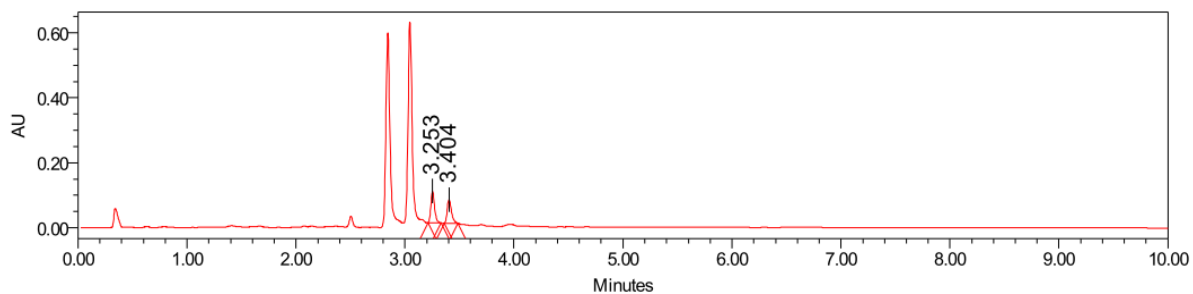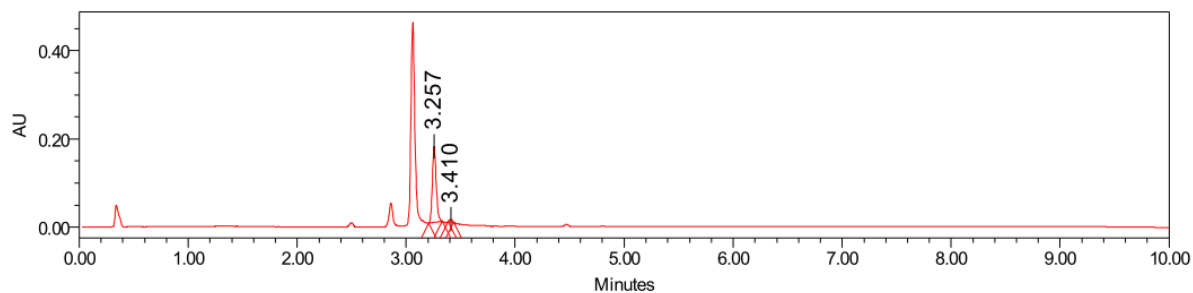

|   | RT    | Area   | % Area | Height |
|---|-------|--------|--------|--------|
| 1 | 3.257 | 418345 | 97.59  | 172537 |
| 2 | 3.410 | 10341  | 2.41   | 5906   |

**(3d) 2-((6*S*,7*S*,10*aR*)-2-Bromo-6-oxo-6a,7,10,10a-tetrahydro-6*H*-benzo[*c*]chromen-7-yl)acetaldehyde**

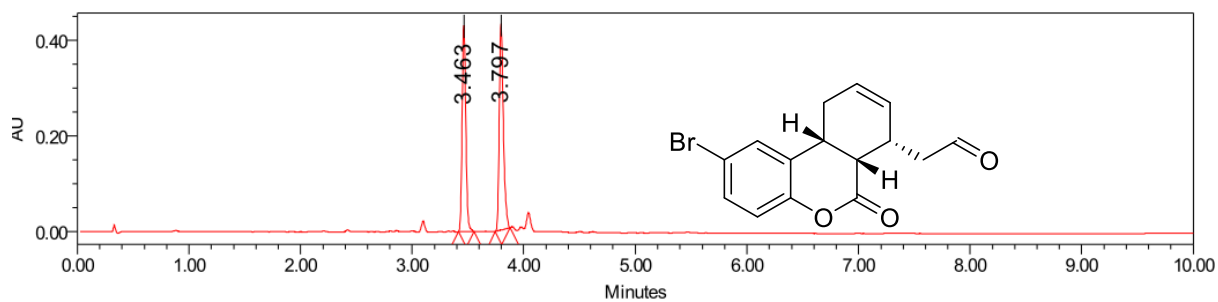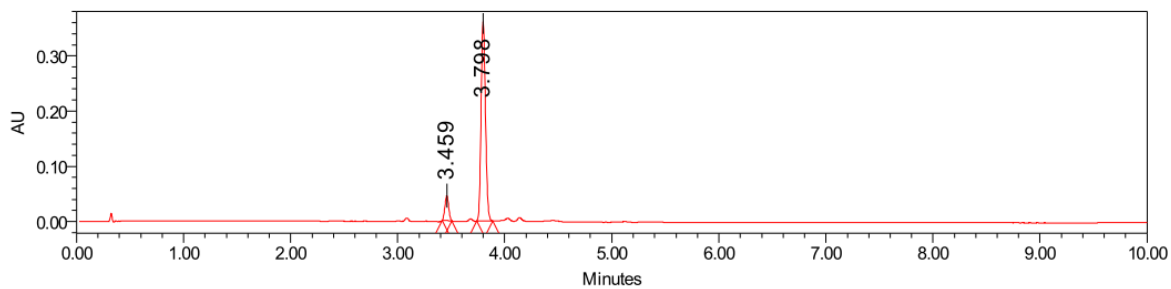

|   | RT    | Area    | % Area | Height |
|---|-------|---------|--------|--------|
| 1 | 3.459 | 109802  | 9.63   | 44953  |
| 2 | 3.798 | 1030281 | 90.37  | 362226 |



**(3e) 2-((6a*S*,7*S*,10a*R*)-2-Methyl-6-oxo-6a,7,10,10a-tetrahydro-6*H*-benzo[*c*]chromen-7-yl)acetaldehyde**

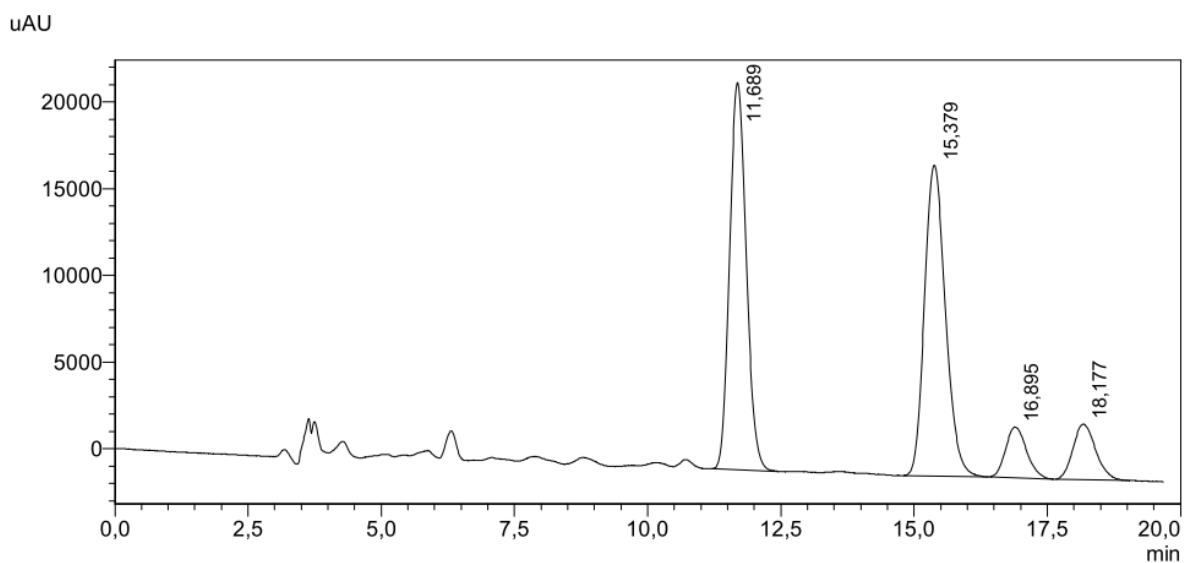

**Major diastereoisomer**

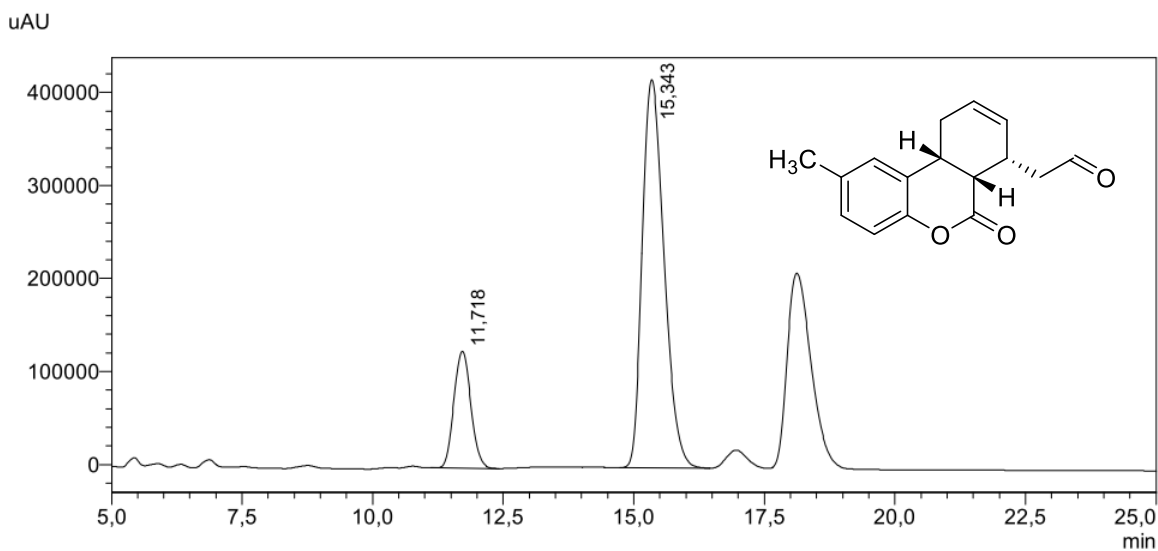

| Peak# | Ret. Time | Area%   |
|-------|-----------|---------|
| 1     | 11,718    | 19,046  |
| 2     | 15,343    | 80,954  |
| Total |           | 100,000 |

### Minor diastereoisomer

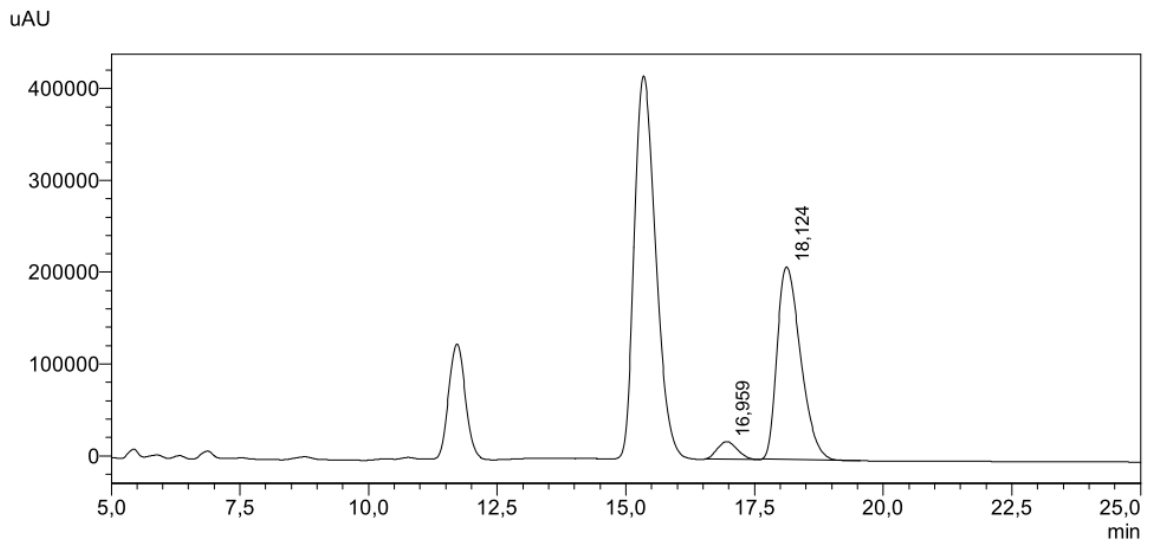

| Peak# | Ret. Time | Area%   |
|-------|-----------|---------|
| 1     | 16,959    | 7,175   |
| 2     | 18,124    | 92,825  |
| Total |           | 100,000 |

**(3f) 2-((6*S*,7*S*,10*aR*)-2-Methoxy-6-oxo-6*a*,7,10,10*a*-tetrahydro-6*H*-benzo[*c*]chromen-7-yl)acetaldehyde**

**Major diastereoisomer**

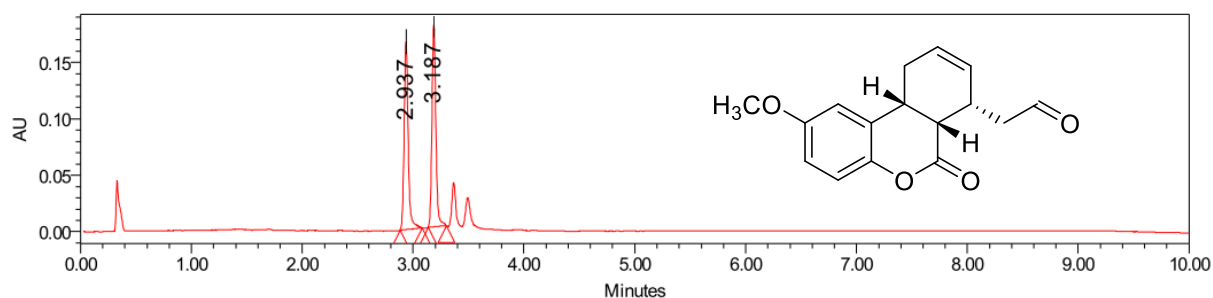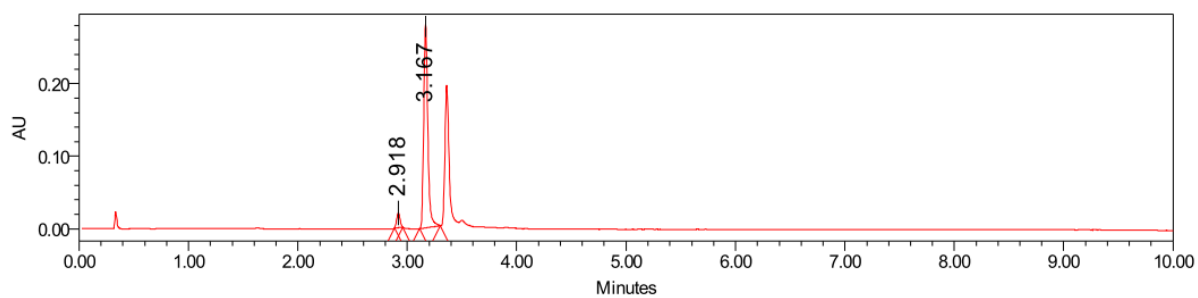

|   | RT    | Area   | % Area | Height |
|---|-------|--------|--------|--------|
| 1 | 2.918 | 43992  | 5.72   | 20585  |
| 2 | 3.167 | 724587 | 94.28  | 279865 |

**Minor diastereoisomer**

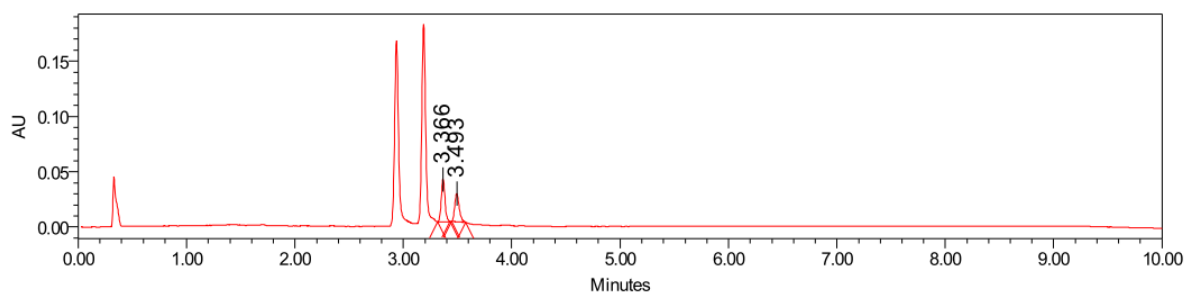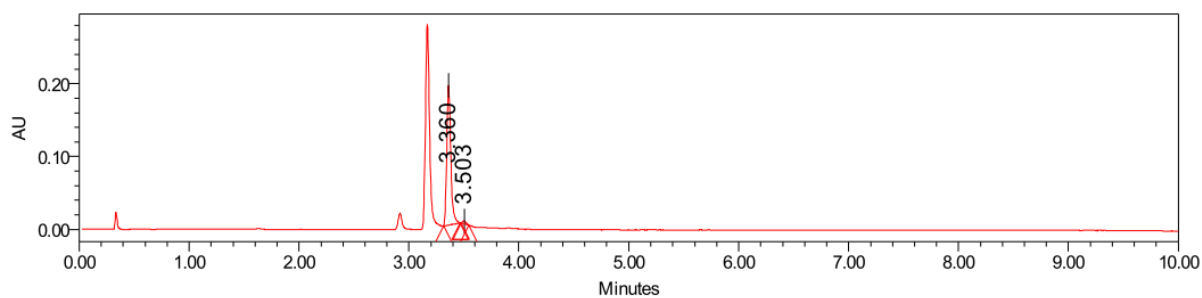

|   | RT    | Area   | % Area | Height |
|---|-------|--------|--------|--------|
| 1 | 3.360 | 487857 | 98.22  | 191720 |
| 2 | 3.503 | 8827   | 1.78   | 3939   |

**(3g) 2-((6*S*,7*S*,10*aR*)-3-Methoxy-6-oxo-6*a*,7,10,10*a*-tetrahydro-6*H*-benzo[*c*]chromen-7-yl)acetaldehyde**  
**Major diastereoisomer**

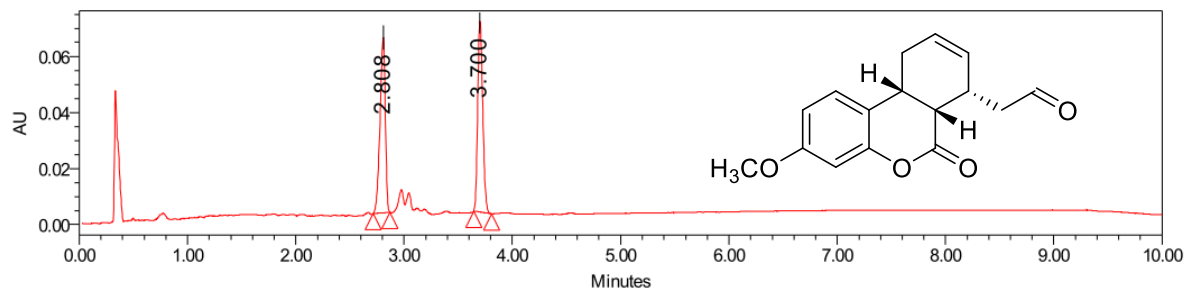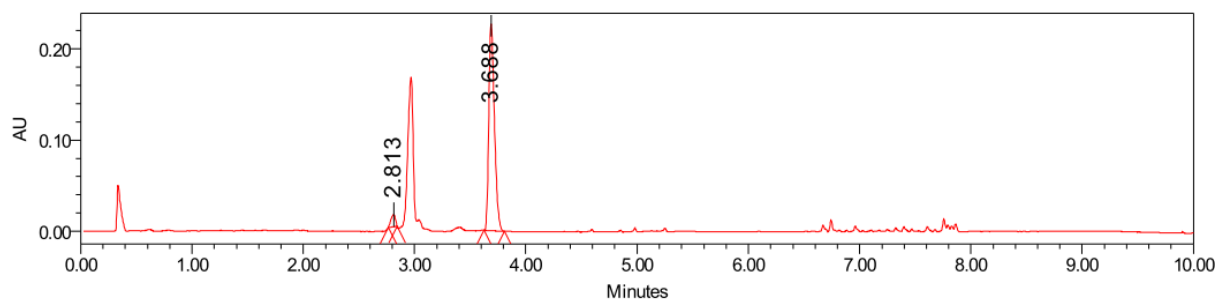

|   | RT    | Area   | % Area | Height |
|---|-------|--------|--------|--------|
| 1 | 2.813 | 37210  | 4.45   | 13357  |
| 2 | 3.688 | 799462 | 95.55  | 226814 |

**Minor diastereoisomer**

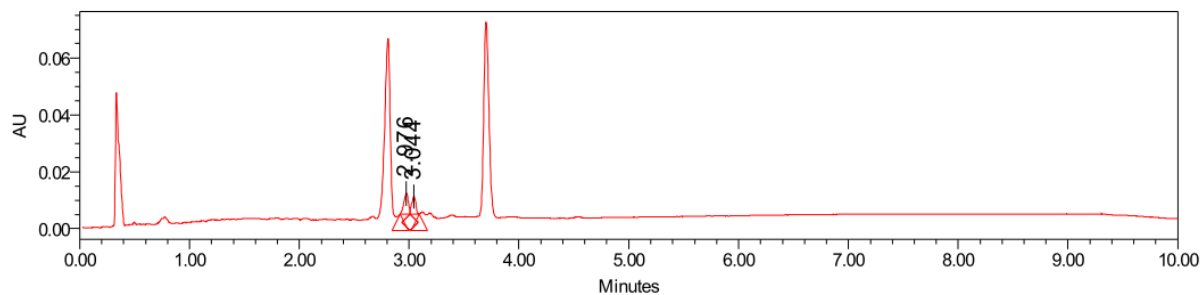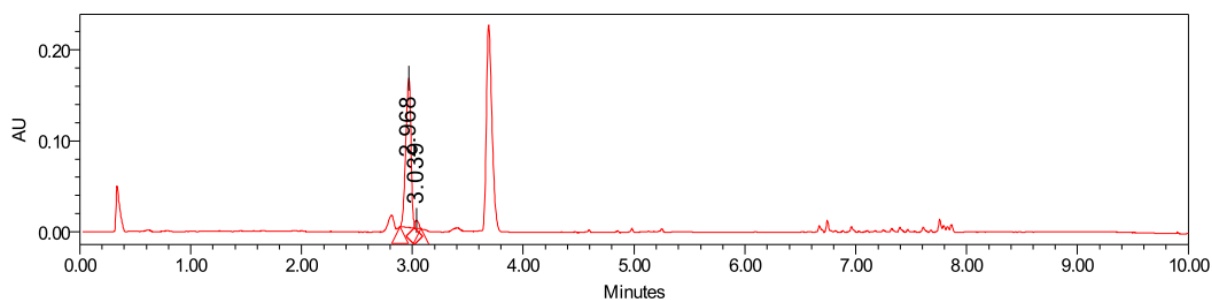

|   | RT    | Area   | % Area | Height |
|---|-------|--------|--------|--------|
| 1 | 2.968 | 537049 | 96.50  | 164457 |
| 2 | 3.039 | 19506  | 3.50   | 8691   |

**(3h) 2-((6a*S*,7*S*,10a*R*)-6-Oxo-6a,7,10,10a-tetrahydro-6*H*-dibenzo[*c,h*]chromen-7-yl)acetaldehyde**  
**Major diastereoisomer**

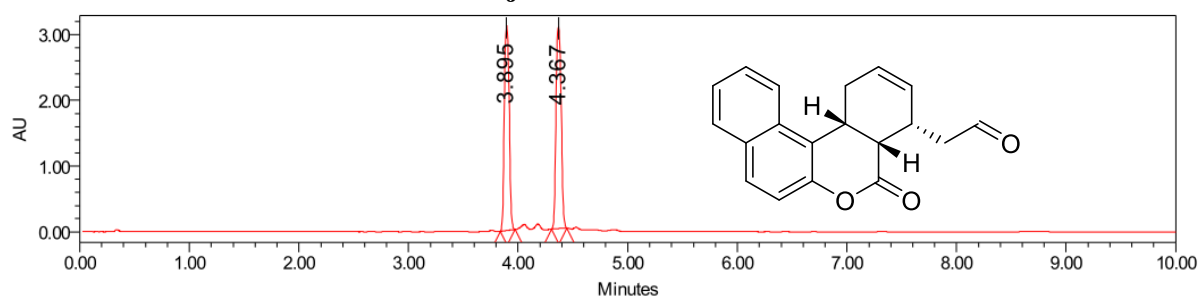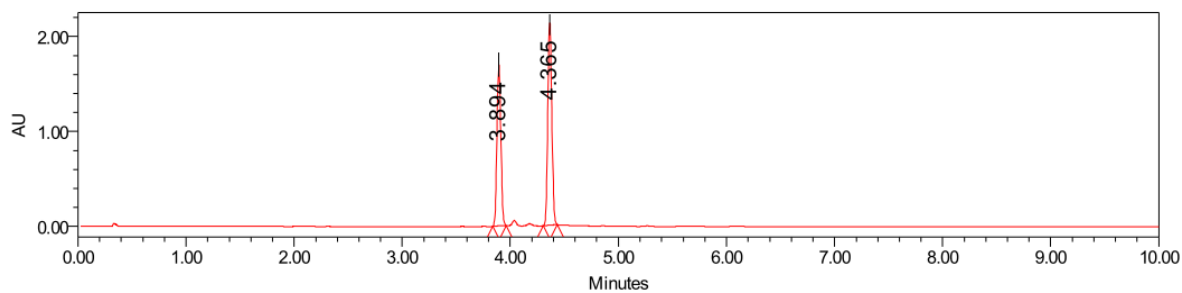

|   | RT    | Area    | % Area | Height  |
|---|-------|---------|--------|---------|
| 1 | 3.894 | 4295315 | 43.86  | 1704277 |
| 2 | 4.365 | 5497210 | 56.14  | 2135885 |

**(3i) 2-((6a*S*,7*S*,10a*R*)-2,4-Dichloro-6-oxo-6a,7,10,10a-tetrahydro-6*H*-benzo[*c*]chromen-7-yl)acetaldehyde**  
**Major diastereoisomer**

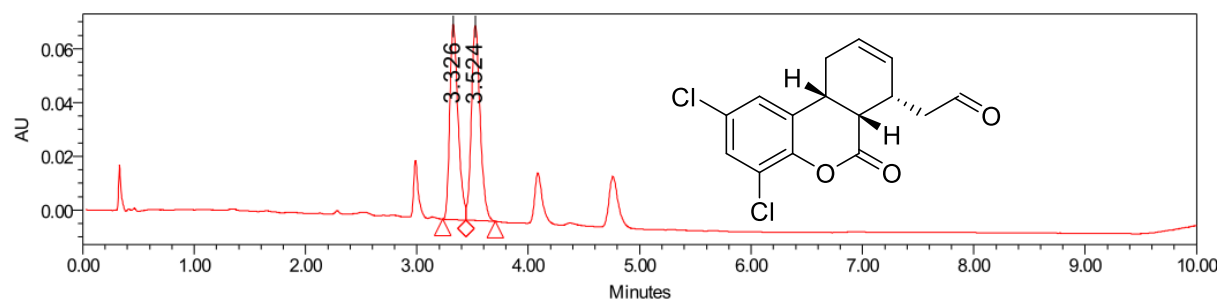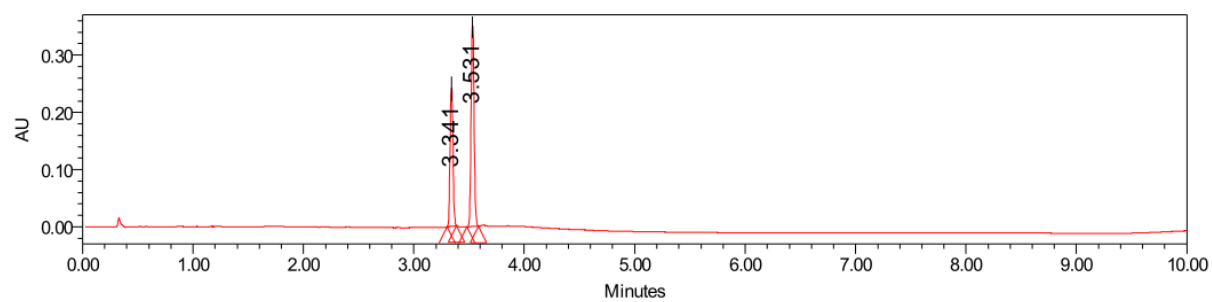

|   | RT    | Area   | % Area | Height |
|---|-------|--------|--------|--------|
| 1 | 3.341 | 436407 | 39.88  | 242027 |
| 2 | 3.531 | 657856 | 60.12  | 353646 |

**(3j) 2-((6*S*,7*S*,10*aR*)-9-Methyl-6-oxo-6*a*,7,10,10*a*-tetrahydro-6*H*-benzo[*c*]chromen-7-yl)acetaldehyde**  
**Major diastereoisomer**

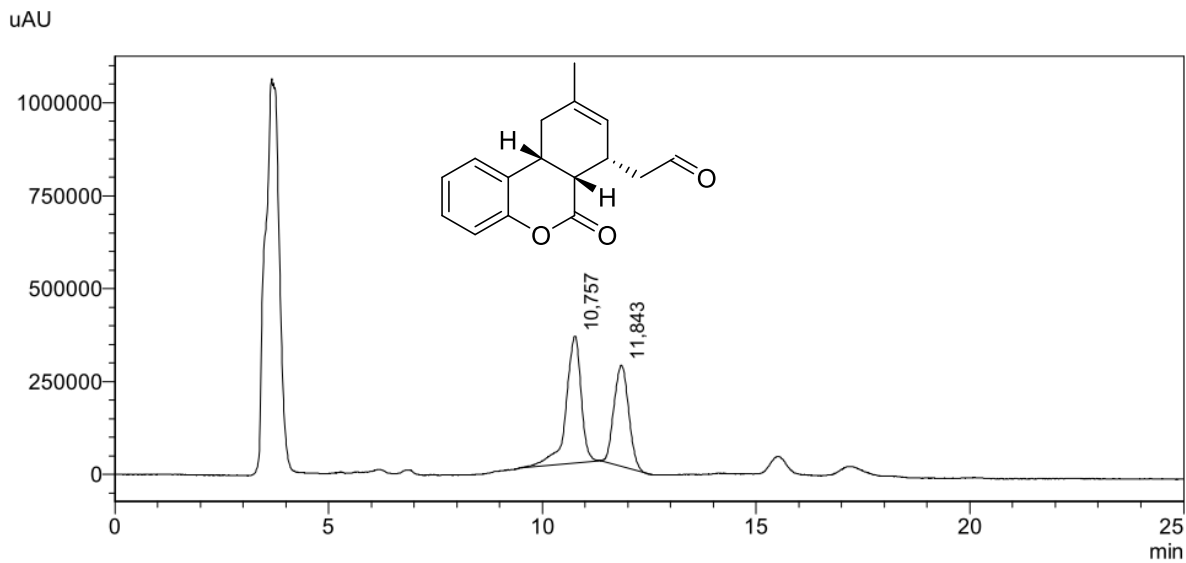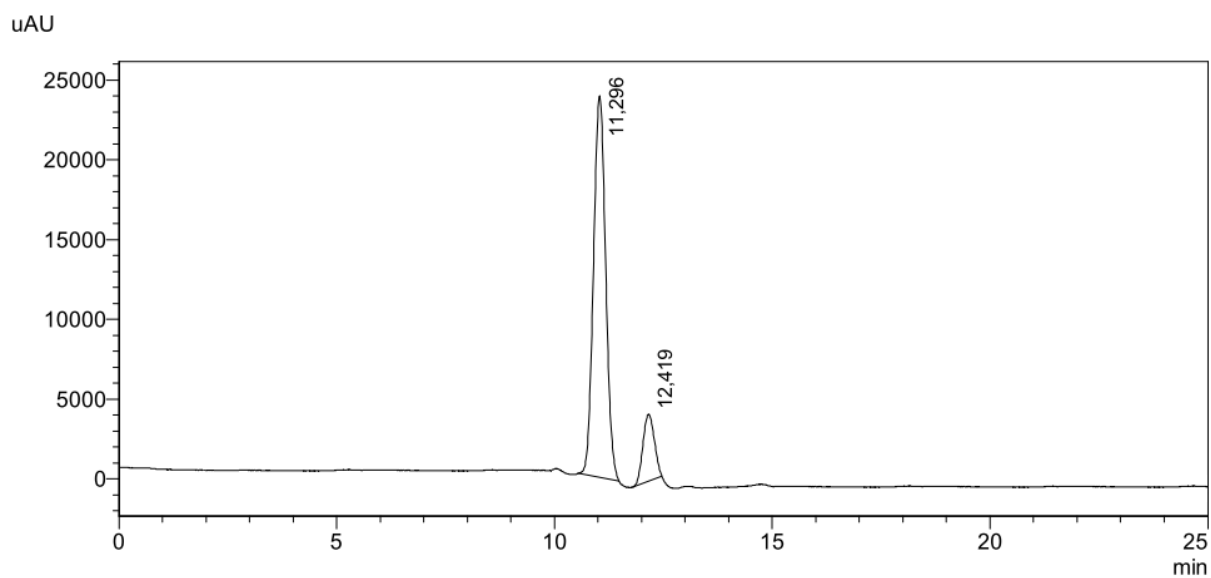

| Peak# | Ret. Time | Area%   |
|-------|-----------|---------|
| 1     | 11,296    | 85,825  |
| 2     | 12,419    | 14,175  |
| Total |           | 100,000 |

**(3k) 2-((6*aS*,7*R*,10*aR*)-8,9-Dimethyl-6-oxo-6*a*,7,10,10*a*-tetrahydro-6*H*-benzo[*c*]chromen-7-yl)acetaldehyde**  
**Major diastereoisomer**

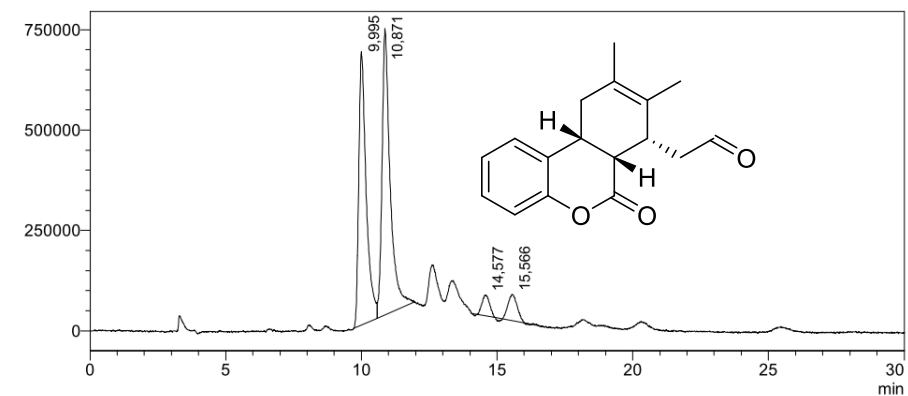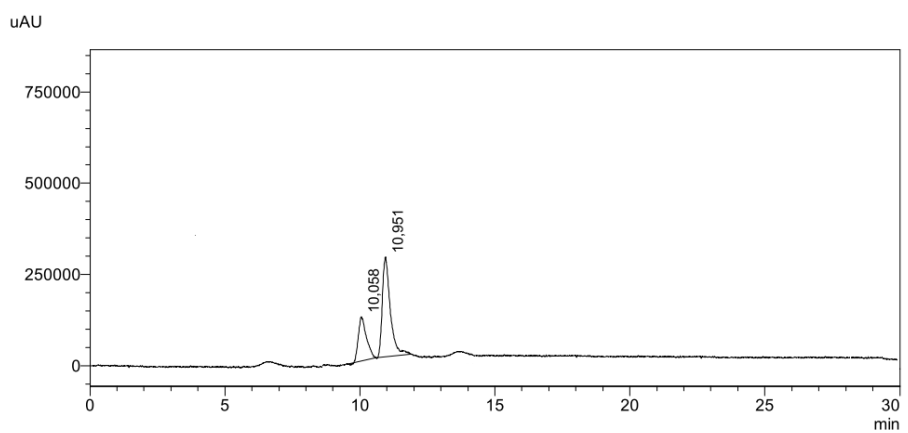

| Peak# | Ret. Time | Area%   |
|-------|-----------|---------|
| 1     | 10,058    | 30,639  |
| 2     | 10,951    | 69,361  |
| Total |           | 100,000 |



**(3l) 2-((6*aS*,7*S*,10*R*,10*aR*)-6-Oxo-10-propyl-6*a*,7,10,10*a*-tetrahydro-6*H*-benzo[*c*]chromen-7-yl)acetaldehyde**  
**Major diastereoisomer**

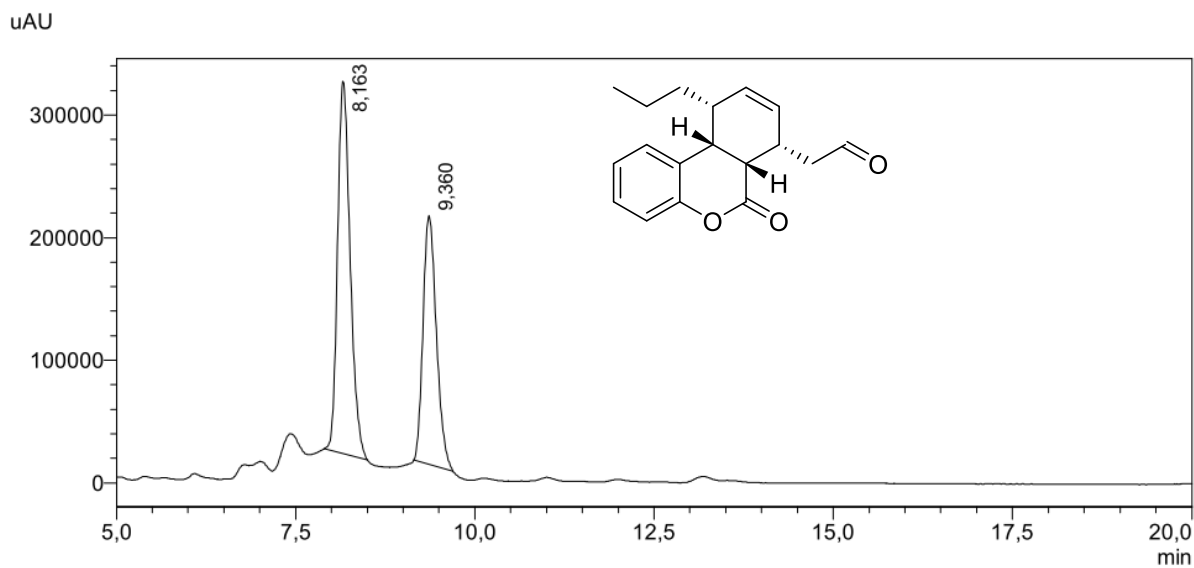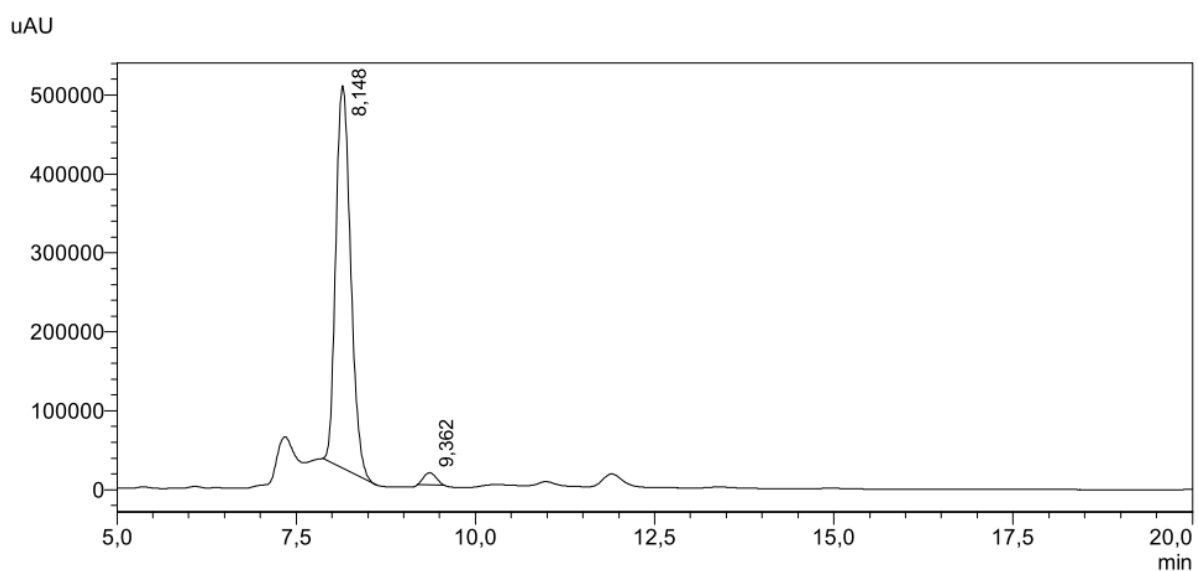

| Peak# | Ret. Time | Area%   |
|-------|-----------|---------|
| 1     | 8,148     | 97,375  |
| 2     | 9,362     | 2,625   |
| Total |           | 100,000 |

**(3m) 2-((6*S*,7*S*,12*aS*,12*bR*)-6-Oxo-6a,7,9,10,11,12,12a,12b-octahydro-6*H*-naphtho[2,1-  
c]chromen-7-yl)acetaldehyde**  
**Major diastereoisomer**

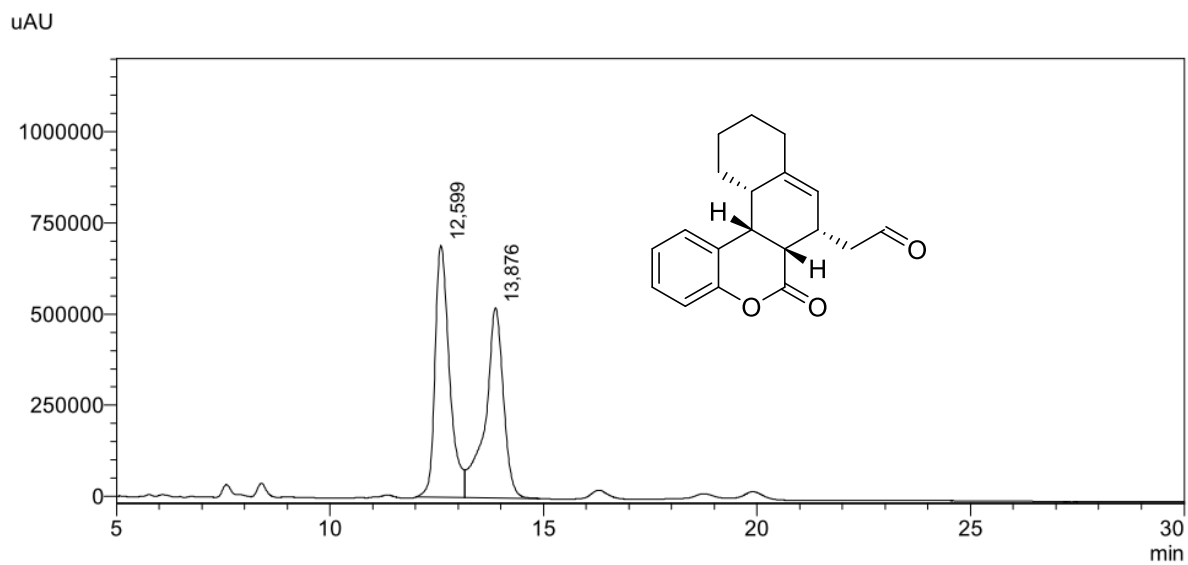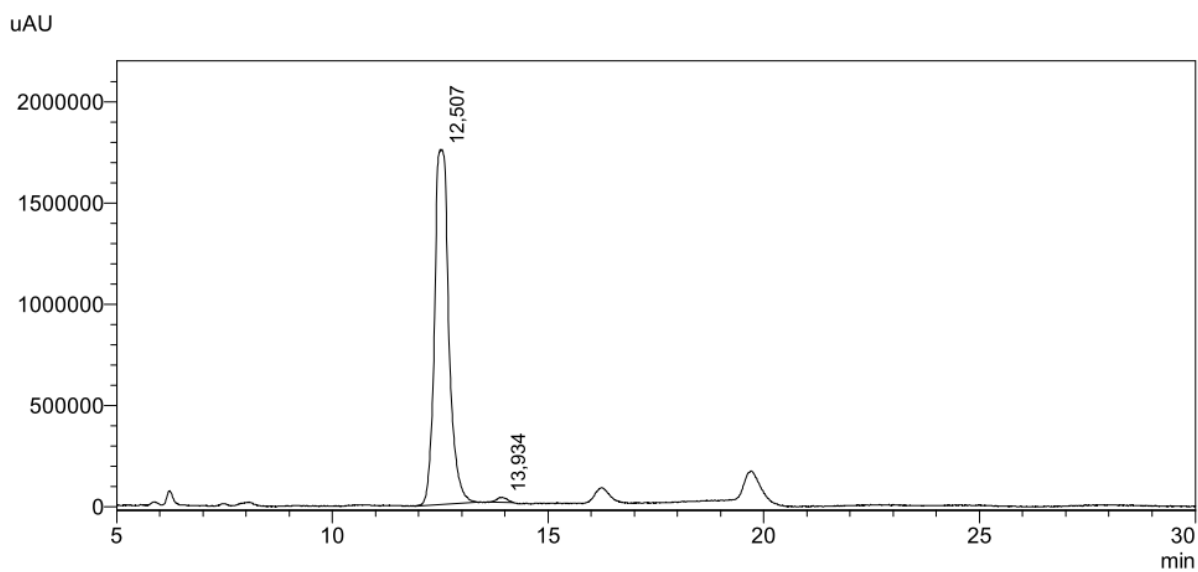

| Peak# | Ret. Time | Area%   |
|-------|-----------|---------|
| 1     | 12,507    | 98,950  |
| 2     | 13,934    | 1,050   |
| Total |           | 100,000 |
